1 **Inner membrane complex proteomics reveals a palmitoylation cascade**  
2 **regulating intraerythrocytic development of malaria parasite**

3 Pengge Qian<sup>1,4</sup>, Xu Wang<sup>1,4</sup>, Chuan-Qi Zhong<sup>1,4</sup>, Jiayu Wang<sup>2,4</sup>, Mengya Cai<sup>1</sup>, Wang  
4 Nguitragool<sup>3</sup>, Jian Li<sup>1,\*</sup>, Huiting Cui<sup>1,\*</sup>, Jing Yuan<sup>1,\*</sup>

5 <sup>1</sup> State Key Laboratory of Cellular Stress Biology, Innovation Center for Cell Signal  
6 Network, School of Life Sciences, Xiamen University, Xiamen, Fujian 361102, China

7 <sup>2</sup> Xiamen Center for Disease Control and Prevention, Xiamen, Fujian 361021, China

8 <sup>3</sup> Department of Molecular Tropical Medicine and Genetics, Faculty of Tropical  
9 Medicine, Mahidol University, Ratchathewi, 10400, Bangkok, Thailand.

10 <sup>4</sup> These authors contributed equally

11 \*Correspondence email: [yuanjing@xmu.edu.cn](mailto:yuanjing@xmu.edu.cn), [huitingcui@xmu.edu.cn](mailto:huitingcui@xmu.edu.cn), or  
12 [jianli\\_204@xmu.edu.cn](mailto:jianli_204@xmu.edu.cn)

13 **Abstract**

14 Malaria is caused by infection of the erythrocytes by the parasites *Plasmodium*. Inside  
15 the erythrocytes, the parasites multiply via schizogony, an unconventional cell division  
16 mode. The Inner Membrane Complex (IMC), an organelle located beneath the parasite  
17 plasma membrane, serving as the platform for protein anchorage, is essential for  
18 schizogony. So far, complete repertoire of IMC proteins and their localization  
19 determinants remain unclear. Here we used biotin ligase (TurboID)-based proximity  
20 labelling to compile the proteome of the schizont IMC of rodent malaria parasite  
21 *Plasmodium yoelii*. In total, 300 TurboID-interacting proteins were identified. 19 of the  
22 22 selected candidates were confirmed to localize in the IMC, indicating good reliability.  
23 In light of the existing palmitome of *Plasmodium falciparum*, 83 proteins of the *P. yoelii*  
24 IMC proteome are potentially palmitoylated. We further identified DHHC2 as the major  
25 resident palmitoyl-acyl-transferase of the IMC. Depletion of DHHC2 led to defective  
26 schizont segmentation and growth arrest both *in vitro* and *in vivo*. DHHC2 was found  
27 to palmitoylate two critical IMC proteins CDPK1 and GAP45 for their IMC localization.

28 In summary, this study reports an inventory of new IMC proteins and demonstrates a  
29 central role of DHHC2 in governing IMC localization of proteins during the schizont  
30 development.

31

## 32 **Introduction**

33 Malaria, a human scourge caused by the protozoans of the genus *Plasmodium*, affects  
34 more than 200 million people and is responsible for approximately half a million deaths  
35 in 2019 [1]. The symptoms of malaria are caused by the intraerythrocytic proliferation  
36 of the parasites. After erythrocyte invasion, the parasites replicate via schizogony to  
37 produce up to 32 invasive daughter cells called the merozoites. Following their release  
38 from the host cell, these merozoites invade other erythrocytes and continue the  
39 intraerythrocytic life cycle.

40

41 A defining feature of apicomplexan parasites including the *Plasmodium* is the organelle  
42 Inner Membrane Complex (IMC) which are flattened membranous vesicles beneath the  
43 plasma membrane (PM). In *Plasmodium*, the IMC is present in the invasive or motile  
44 stages such as the merozoites, ookinetes, and sporozoites of all *Plasmodium*, as well as  
45 in the male gametocytes of human pathogen *P. falciparum* [2, 3]. In the asexual cycle  
46 of the *Plasmodium*, the biogenesis of the IMC begins at the early schizont stage after  
47 organelle duplication in the cytoplasm and several rounds of genome replication within  
48 the intact nucleus [4]. Allocation and packaging of nuclei and organelles into daughter  
49 cells are achieved by cytokinesis, in which the PM and the extending IMC coordinately  
50 invaginate and surround each daughter haploid merozoite [5]. As a result, the pellicle  
51 of merozoite is composed of single membrane of PM, closely aligned double  
52 membranes of the IMC, and 2-3 subpellicular microtubules (SPMT) associated with the  
53 IMC [6]. After invasion into a new erythrocyte, the IMC disassembles at the early ring  
54 stage [5]. The IMC is best recognized as the platform for attaching the actomyosin  
55 motor complex-glideosome (occupying in the space between PM and IMC) responsible  
56 for parasite invasion and motility [7, 8]. It also serves to maintain the cell shape and  
57 rigidity of the merozoite [9]. The cytoplasmic side of IMC is associated with a rigid  
58 meshwork composed of several families of proteins including alveolins [10], which is  
59 important for IMC-SPMT interconnection.

60

61 To understand the role(s) of the IMC in the parasite development, obtaining the  
62 complete list of protein components of the IMC is important. However, systematic  
63 proteomic analyses on the IMC protein composition have not been reported due to the  
64 difficulty in separating the IMC from other membranes, such as the PM. So far, a limited  
65 number of IMC and IMC-associated proteins have been identified, by either candidate  
66 gene strategy or isolating the interactors of IMC protein. Known IMC proteins include  
67 GAP45 (glideosome-associated protein 45) [11], GAP40 [12], GAP50 [13], MTIP  
68 (myosin A tail domain interacting protein)[14], MyoA [14], ECL1 [15], GAPM1 (GAP  
69 with multiple-membrane spans 1), GAPM2, and GAPM3 [16], as well as the alveolin  
70 proteins IMCp, IMC1c, IMC1e, IMC1f, IMC1g [3], and ISP3 [17]. In addition, CDPK1  
71 (calcium-dependent kinase 1) and PhIL1 (Photosensitized INA-Labeled protein 1) were  
72 also reported to reside in the IMC of schizonts [18, 19]. BCP1, MORN1, and CINCH,  
73 components of the basal complex, a sub-compartment of the IMC at the posterior  
74 extending edge, were also recently identified [20]. Remarkably, most of the known IMC  
75 proteins were refractory to gene deletion, suggesting an essential function in the  
76 development of asexual blood stage [5]. Among the IMC proteins, GAP45 and CDPK1  
77 have been studied extensively. CDPK1 plays a key role in early schizont development  
78 as its depletion or inhibition causes parasite arrest at the early schizonts [18, 21]. On  
79 the other hand, GAP45 is essential for merozoite invasion [11]. Despite great efforts in  
80 IMC research, many questions still remain regarding the IMC components and their  
81 function in schizogony. How many proteins are there in IMC? What determines IMC  
82 protein localization?

83

84 Enzyme-catalyzed proximity labelling (PL) coupled with mass spectrometry (MS)  
85 offers an alternative approach for proteome discovery [22]. BioID is an engineered  
86 bacterial biotin ligase adapted for proximity-based biotinylation of proteins in living  
87 cells [23]. The proteins covalently labeled with biotin can be isolated by streptavidin-  
88 biotin affinity purification followed by MS analysis. BioID has been used to identify  
89 the protein components of complexes and organelles in different model organisms [24].  
90 In the *Plasmodium*, BioID-based PL had also generated organelle- and vesicle-specific  
91 proteins or proteomes, including those of the gametocyte-specific osmiophilic bodies  
92 of *P. berghei*, the blood stage parasitophorous vacuolar membrane of *P. berghei* and *P.*  
93 *falciparum*, the apicoplast of *P. falciparum*, and the IMC and apical annuli proteins of  
94 *P. falciparum* [25-30]. These analyses have led to the functional discovery of previously

95 undescribed proteins, providing new insights in the organelle biology of malaria  
96 parasites. However, BioID requires parasite exposure to biotin over a long period (18-  
97 24 h), which are not ideal or feasible for certain developmental stages with a short life  
98 span. In addition, BioID does not work well at temperatures below 37°C [31, 32],  
99 rendering its application to the mosquito stages of *Plasmodium* unsuitable. Recently, a  
100 new biotin ligase TurboID was developed by directed evolution [33]. Compared to  
101 BioID, TurboID is faster and can work under a broader range of temperature [33]. So  
102 far, the application of TurboID in the *Plasmodium* has not been reported.

103

104 In this study, we applied TurboID-proximity labeling and quantitative MS to obtain a  
105 proteome of the IMC in the schizonts of rodent malaria parasite *P. yoelii*. IMC targeting  
106 was achieved by fusing TurboID with the N-terminal 20 residues of ISP1, a known IMC  
107 resident protein. A collection of 300 proteins were identified as candidate IMC and  
108 IMC-associated proteins, of which 83 are potentially palmitoylated. We further  
109 demonstrated DHHC2 as a master IMC palmitoyl-acyl-transferase which plays a  
110 critical role in schizont segmentation and merozoite invasion by regulating the IMC  
111 localization of CDPK1 and GAP45 via palmitoylation.

112

## 113 **Results**

### 114 **Biotin-labelling of *Plasmodium* proteins by TurboID ligase**

115 To test the activity of the TurboID ligase relative to the BioID ligase for PL of malaria  
116 parasites, we fused a hemagglutinin (HA) tag to the N-terminus of each ligase (**Fig**  
117 **S1A**). These ligases were episomally expressed in the asexual blood stages of *P. yoelii*  
118 under the promoter of the *isp3* gene (**Fig S1A**), a gene that is highly transcribed in the  
119 schizonts [34]. Immunoblot detected comparable BioID and TurboID expressions in the  
120 asexual blood stages (**Fig S1B**). Different from an automatic rupture of mature  
121 schizonts of the *in vitro* cultured *P. falciparum*, the *P. yoelii* schizonts displayed an arrest  
122 in rupture after maturation in the *in vitro* condition, which permits PL of mature  
123 schizonts. The schizonts expressing each ligase were incubated with 100 µM biotin at  
124 37°C for different time (0.25, 1, 3, and 18 h). Immunoblot using streptavidin-HRP  
125 detected robust protein biotinylation in the cell extracts of TurboID-parasites as early  
126 as 0.25 h after biotin incubation (**Fig S1C**). In contrast, protein biotinylation in the

127 BioID-parasites appeared at a low level at 3 h and reached a high level at 18 h (Fig  
128 S1C). To confirm these results, dot blot experiments were performed using streptavidin-  
129 HRP and similar results were observed (Fig S1D). Next we tested the temperature  
130 compatibility of the two ligases for PL in the parasites. BioID- and TurboID-schizonts  
131 were incubated for 18 and 3 h respectively, with 100  $\mu$ M biotin at different temperatures  
132 (4, 22, 30, and 37°C). Biotin-incubated parasites stained with fluorescently conjugated  
133 streptavidin revealed that both ligases had similar labelling activity at 30 and 37°C (Fig  
134 S1E and F). Notably, only TurboID retained its activity at 22°C (Fig S1E and F). We  
135 further performed dot blots using streptavidin-HRP and obtained similar results (Fig  
136 S1G). These results indicate that TurboID is active at temperatures lower than 37°C, a  
137 temperature required for BioID to be fully functional. We also tested TurboID-mediated  
138 PL in the ookinetes, a mosquito stage of parasites with a preferential living temperature  
139 at 22°C. Cultured ookinetes from the BioID- and TurboID-parasites were incubated for  
140 18 or 3 h respectively, with 100  $\mu$ M biotin at 22°C. Co-staining with the fluorescently  
141 conjugated streptavidin and anti-HA antibody detected cytosolic protein biotinylation  
142 only in the TurboID-ookinetes when exogenous biotin was added (Fig S1H). Compared  
143 with BioID, TurboID allowed more robust PL of proteins in the living parasites with  
144 shorter biotin incubation time and is less temperature sensitive.

145

#### 146 **Detection of IMC proteins using TurboID labelling and quantitative mass** 147 **spectrometry**

148 Next we applied TurboID for PL of the IMC to identify new IMC proteins in the  
149 schizonts. The HA-tagged TurboID was fused with an IMC signal peptide, the N-  
150 terminal 20 residues of ISP1 (Tb-IMC) [17, 35] (Fig S2A). The HA-tagged TurboID  
151 alone (Tb-cyto) served as a control to indicate non-specific biotinylation (Figure 1A  
152 and Fig S2A), permitting specific identification of IMC and IMC-associated proteins.  
153 Both ligases (Tb-IMC and Tb-cyto) were driven by the promoter of gene *isp3* and  
154 episomally expressed in the asexual blood stages (Fig S2B). As expected, the Tb-IMC  
155 ligase dominantly co-localized with the IMC protein GAP45 in the IMC (Fig S2C). The  
156 schizonts expressing Tb-IMC, Tb-cyto, or empty vector (EV: construct without ligase

157 gene) were purified and treated with 100  $\mu$ M biotin at 37°C for 3 h. Both immunoblot  
158 and dot blot assays using streptavidin-HRP detected increased biotinylation in cell  
159 extracts in the presence of biotin from the Tb-IMC and Tb-cyto schizonts, but not from  
160 the EV group (Figure 1B and Fig S2D). Furthermore, parasites stained with fluorescent-  
161 conjugated streptavidin (SA-488) and anti-HA antibody exhibited an IMC distribution  
162 (surrounding daughter merozoites) of biotinylated proteins, which co-localized with  
163 ligase in Tb-IMC schizonts. The biotinylated proteins and the ligase displayed cytosolic  
164 distribution in the Tb-cyto schizonts, while scarce signal was detected in the EV  
165 schizonts (Figure 1C and Fig S2E). Therefore, the Tb-IMC enables the PL of IMC in  
166 the living schizonts.

167

168 To further confirm that the IMC or IMC-associated proteins were the primary targets of  
169 biotin labeling in the Tb-IMC schizonts, the protein extracts were subjected to  
170 streptavidin pull-down, followed by immunoblot assays. As expected, cis-biotinylation  
171 of the Tb-IMC ligase was detected and the IMC protein GAP45 was enriched in the  
172 pull-down fraction (Fig S2F). In contrast, the proteins of other organelles, including the  
173 MSP1 (PM), Erd2 (Golgi marker), BiP (ER marker), and histone H3 (nucleus) were not  
174 detected (Fig S2F). Three biological replicates were prepared from the Tb-IMC and Tb-  
175 cyto schizonts, and the streptavidin-affinity purified proteins from cell extracts were  
176 subjected to proteomic analyses by SWATH-MS, a data-independent acquisition based  
177 quantitative MS method [36, 37]. The numbers of identified proteins with at least two  
178 independent peptides were comparable between the Tb-IMC (replicate 1:1964 hits,  
179 replicate 2:1995 hits, and replicate 3:1986 hits) and Tb-cyto schizonts (replicate 1:1970  
180 hits, replicate 2:1946 hits, and replicate 3:1948 hits). Correlation analyses of changes  
181 in protein abundance demonstrated good reproducibility among biological replicates  
182 (Fig S2G). Quantitative MS yielded 488 enriched proteins with high confidence (an  
183 adjusted P value < 0.05) in the Tb-IMC compared to the Tb-cyto schizonts (Figure 1D  
184 and Fig S2H).

185

186 Genes coding for IMC proteins display transcription peak at late schizont and merozoite

187 during *P. falciparum* asexual replication cycle [38]. To further filter potential IMC  
188 proteins, we discriminated the 488 Tb-IMC interacting proteins by comparative  
189 analyses of their transcription pattern based on a *P. berghei* transcriptome dataset [34],  
190 thus narrowing the candidates to 300 proteins (Figure 1D, Fig S2H, Table S1). These  
191 300 Tb-IMC proximal interactors included many known IMC or IMC-associated  
192 proteins, including GAP40, GAP45, GAP50, MTIP, MyoA, ELC, GAPM1, GAPM2,  
193 GAPM3, IMCp, IMC1c, IMC1e, IMC1f, IMC1g, ISP3, BCP1, MORN1, CINCH,  
194 CDPK1, Phil1, DHHC1 and DHHC2 (Figure 1E and F). The homologs of these  
195 proteins have displayed an IMC or IMC-like localization in the *Plasmodium*, or have  
196 been shown to interact or associate with IMC protein baits using immunoprecipitation  
197 assay in previous studies [16, 18, 39-43]. Therefore, the IMC and IMC-associated  
198 proteins were enriched in the list of 300 Tb-IMC interacting proteins, suggesting  
199 reliable data quality generated by TurboID and quantitative MS.

200

### 201 **Predicted functional profile of Tb-IMC interacting proteins**

202 To further gain functional insights into the 300 Tb-IMC interacting proteins, we cross-  
203 referenced these proteins with other *Plasmodium* datasets. First, the Tb-IMC proximal  
204 interactors were significantly enriched for interactions using Search Tool for Retrieval  
205 of Interacting Genes/Proteins (STRING) [44], a database of known and predicted  
206 physical and functional protein-protein interactions. Notably, these proteins were  
207 segregated into two distinct subgroups (I and II) (Figure 1E and F). The subgroup I  
208 contained 152 proteins while the subgroup II contained 148 proteins. Most of known  
209 IMC or IMC-associated proteins were clustered into the subgroup I. In contrast, many  
210 annotated ER/Golgi secretory- or vesicle trafficking-related proteins were clustered into  
211 the subgroup II (Figure 1E and F). Second, gene ontology (GO) analysis was performed  
212 to further discriminate the proteins in subgroup I and II (Fig S3). Interestingly, the  
213 subgroup II was highly enriched with the GO terms, including the vesicle-mediated  
214 transport (40 proteins), vesicle fusion (11 proteins), ER to Golgi vesicle-mediated  
215 transport (13 proteins), Golgi vesicle transport (20 proteins) (Fig S3, biological process  
216 panel), and SNARE complex (14 proteins), endosome membrane (9 proteins), late



217 endosome (7 proteins), and endocytic vesicle (16 proteins) ([cellular component panel](#)),  
218 while the subgroup I was mainly assigned with the GO terms, like the inner membrane  
219 pellicle complex (22 proteins) ([cellular component panel](#)), protein lipitation (10  
220 proteins) ([biological process panel](#)), and palmitoyltransferase activity (6 proteins)  
221 ([molecular function panel](#)). The IMC arises de novo from ER/Golgi-derived material  
222 via vesicular trafficking and membrane fusion in the schizonts of each replication cycle  
223 of the parasite [41, 45-47]. Detection of the subgroup II enriched with vesicular  
224 trafficking and membrane fusion effectors agrees with the notion of the ER/Golgi-  
225 derived IMC biogenesis. In addition, subgroup I and II within the Tb-IMC interacting  
226 proteins may reflect the tight and dynamic association between IMC organelle and  
227 endomembrane system in the schizont development.

228

### 229 **Validation of the candidate IMC proteins**

230 To assess whether the identified proteins are indeed localized in the IMC, 22 candidates  
231 were selected among the 300 Tb-IMC interacting proteins for subcellular localization  
232 analysis ([Figure 2A](#)). Among these proteins, the orthologues of 8 proteins including  
233 PY17X\_0314700 (CDPK1), PY17X\_0617900 (CDPK4), PY17X\_1440500 (PKAr),  
234 PY17X\_0839000 (PKAc), PY17X\_1420600 (Rab11A), PY17X\_1462100 (MTIP),  
235 PY17X\_0206000 (PhIL1), and PY17X\_0525300 (GAPM2) have been experimentally  
236 validated to be IMC-residing or association in the schizonts of *P. berghei* or *P.*  
237 *falciparum* [16, 18, 19, 40, 48-51], while IMC localization or association of the 14 other  
238 candidates (PY17X\_0207400, PY17X\_0312400, PY17X\_0417300, PY17X\_0418000,  
239 PY17X\_0812700, PY17X\_0917100, PY17X\_1131200, PY17X\_1139700,  
240 PY17X\_1220300, PY17X\_1348200, PY17X\_1359500, PY17X\_1411000,  
241 PY17X\_1441500, and PY17X\_1453100) ([Figure 2B](#)) have not been well characterized  
242 in the *Plasmodium*. Each candidate gene was tagged with a 6HA at the N- or C-terminus  
243 and driven by the promoter of gene *isp3* for episomal expression in the asexual blood  
244 stages. Immunoblot assays were used to detect each protein, all displaying a band fitting  
245 their expected molecular weight ([Fig S4A](#)). As expected, immunofluorescence assays  
246 (IFA) showed clear co-localization of the 8 known proteins (CDPK1, CDPK4, PKAr,



247 PKAc, Rab11A, MTIP, PhIL1, and GAPM2) with the IMC marker GAP45 (Fig S4B).  
248 Among the 14 newly characterized candidates, 11 of them (PY17X\_0312400,  
249 PY17X\_0418000, PY17X\_0812700, PY17X\_1131200, PY17X\_1139700,  
250 PY17X\_1220300, PY17X\_1348200, PY17X\_1359500, PY17X\_1411000,  
251 PY17X\_1441500, and PY17X\_1453100) displayed the IMC or IMC-like pellicle  
252 localization (Figure 2C), while 3 other candidates (PY17X\_0207400, PY17X\_0417300,  
253 and PY17X\_0917100) did not. Collectively, we confirmed the IMC or IMC-like  
254 localization of 19 proteins from the 22 candidates in the *P. yoelii* schizonts.

255

### 256 **Palmitoylation of IMC proteins and regulation of localization**

257 While a growing number of IMC proteins were discovered, their localization  
258 determinants remain incompletely known. Protein palmitoylation is a reversible lipid  
259 modification that facilitates protein attachment to the plasma and organelle membranes  
260 [52]. Previous studies have shown that palmitoylation is important for the binding or  
261 targeting of proteins to IMC in the *Plasmodium* [17, 35]. We speculated that certain  
262 IMC proteins use lipid moieties for IMC membrane attachment. Interestingly, we  
263 observed a significant enrichment of the biological-process term of protein lipidation  
264 (GO: 0006497) in the Tb-IMC interacting proteins (Figure 3A and Fig S3). Three  
265 palmitoyl-S-acyl-transferases (PAT) including DHHC1, DHHC2, and DHHC7, were  
266 enriched (Figure 3A), implying a role of these PATs for palmitoylation of the IMC  
267 proteins.

268

269 To identify IMC proteins with palmitoylation, we examined a collection of 494  
270 palmitoylated proteins previously detected in the schizonts of *P. falciparum* [53].  
271 Among the 300 *P. yoelii* Tb-IMC interacting proteins identified in this study, 83 proteins  
272 (28%) have orthologs that are palmitoylated in the *P. falciparum* (Figure 3B and Table  
273 S2). Importantly, these 83 proteins includes GAP45 and ISP3, whose palmitoylations  
274 have been experimentally validated [17, 53], and CDPK1, GAP50, IMC1g, and IMC1c,  
275 which are predicted to be palmitoylated. Out of these 83 proteins, we assessed 4  
276 (CDPK1, GAP45, ISP3, and a newly identified IMC protein PY17X\_1411000) for their

277 palmitoylation using resin-assisted capture of acylated proteins (Acyl-RAC) method  
278 [54]. Palmitoylation was confirmed in these 4 proteins in *P. yoelii* schizonts (Figure 3C)  
279 while PhIL1, an IMC protein not in the list of 83 proteins, did not display palmitoylation  
280 (Figure 3C). To further confirm palmitoylation, the schizont culture was treated with  
281 100  $\mu$ M 2-bromopalmitate (2-BP), an inhibitor of protein palmitoylation. We observed  
282 markedly reduced palmitoylation of CDPK1, GAP45, and ISP3 in the 2-BP treated  
283 schizonts (Figure 3D). Notably, CDPK1, GAP45, and 1411000 lost their IMC  
284 localization and were found in the cytosol after 2-BP treatment (Figure 3E). As a control,  
285 the PM localization of merozoite surface protein MSP1 was unaffected. Fractionation  
286 of schizont protein extracts (Figure 3F) revealed that CDPK1, GAP45, and 1411000  
287 were mainly present in the heavy fraction, in agreement with the IMC membrane  
288 association of these proteins. However, these proteins were mostly detected in the light  
289 fraction after 2-BP treatment, suggesting their distribution alterations after losing the  
290 palmitoylation. Together, these results suggest that palmitoylation may exist in a  
291 relatively high proportion of the IMC proteins and that it is important for subcellular  
292 localization of certain IMC proteins including CDPK1, GAP45, and 1411000.

293

#### 294 **DHHC2 is an IMC-residing palmitoyl-S-acyl-transferase in schizonts**

295 Next, we searched for the PATs that catalyze the palmitoylation of IMC residing  
296 proteins in the schizonts. 11 putative PATs (named DHHC1–11) were predicted in the  
297 genomes of rodent malaria parasites [39]. Quantitative reverse transcription-PCR (qRT-  
298 PCR) analysis revealed that the *P. yoelii dhhc2* displayed the highest mRNA level in  
299 the schizonts (Figure 4A). The mRNA levels of these *P. yoelii dhhc* genes were  
300 positively correlated ( $R^2 = 0.94$ ) with the transcription profiles of their orthologs in *P.*  
301 *berghei* determined via RNA-seq [34] (Figure 4A). Furthermore, we analyzed the  
302 localization of the 11 *P. yoelii* endogenous PATs individually in the schizonts of  
303 transgenic strains previously generated [17]. Out of the 11 PATs, only DHHC1 and  
304 DHHC2 displayed clear IMC localization in the schizonts with a stronger IFA signal  
305 for DHHC2 (Figure 4B and Fig S5A). Immunoblot analysis of protein extracts from the  
306 same number of schizonts of the endogenously tagged *dhhc2::6HA* and *dhhc1::6HA*

307 parasites revealed approximately 5-fold higher level of DHHC2 than DHHC1 (Figure  
308 4C). Interestingly, DHHC2 but not DHHC1 displayed an interrelation with several IMC  
309 proteins, including CDPK1 and GAP45, in a STRING analysis which predicts the  
310 likelihood of protein-protein interaction (Fig S5B). The IMC localization of DHHC2  
311 was confirmed in two independent strains *6HA::dhhc2* and *dhhc2::4Myc*, whose  
312 endogenous DHHC2 was tagged with a N-terminal 6HA and C-terminal 4Myc tag,  
313 respectively (Figure 4D). Immunoblot analyses of the membrane and cytoplasmic  
314 fractions of schizont lysates also revealed that DHHC2 was mainly detected in the  
315 membrane fraction (Figure 4E). As a control, merozoite PM protein MSP1 was detected  
316 in the membrane fraction while the cytosolic protein GAPDH was in the cytoplasmic  
317 fraction (Figure 4E).

318

319 To investigate the expression dynamics of DHHC2 during parasite development, early  
320 and later stages of intraerythrocytic *dhhc2::6HA* parasites were isolated using the  
321 Nycodenz gradient centrifugation. Immunoblot showed that DHHC2 is highly  
322 expressed in the late trophozoites and schizonts, but not in the rings or early  
323 trophozoites (Figure 4F). IFA also revealed DHHC2 signal in the early and mature  
324 schizonts and free merozoites (Figure 4G). These observations were independently  
325 confirmed in another strain *gfp::dhhc2*, in which endogenous DHHC2 was tagged with  
326 a N-terminal GFP (Figure 4H). The expression dynamics of DHHC2 is consistent with  
327 the IMC biogenesis in the schizonts. Using the Airyscan microscopy, we observed clear  
328 co-localization between DHHC2 and GAP45 in both early and mature schizonts (Figure  
329 4I). Interestingly, both proteins were found as separate dots at the periphery of the intact  
330 nucleus in the early schizonts (Figure 4I), suggesting that IMC arises de novo at  
331 multiple points at or close to the nucleus. Together, these results indicate that DHHC2,  
332 as an IMC-residing PAT, is expressed throughout the IMC biogenesis in the schizonts  
333 of *P. yoelii*. (Figure 4J)

334

### 335 **DHHC2 is essential for the asexual blood stage development in mice**

336 DHHC2 has been suggested to play an essential role in the asexual blood stage

337 development of the parasites since no viable mutant clone was obtained using either the  
338 conventional or Cas9-based knockout strategies in the *P. yoelii* and *P. berghei* [17, 55].  
339 To explore the functions of DHHC2, we applied an Auxin-inducible degron (AID)-  
340 based protein degradation system in the *P. yoelii* transgenic strain *Tir1* [56], which  
341 allows depletion of the target protein fused to a miniAID (mAID) motif with the aid of  
342 the plant hormone auxin (Indole-3-acetic acid, IAA). The N-terminus of the  
343 endogenous *dhhc2* locus was tagged with the sequence encoding mAID::2HA in the  
344 *Tir1* strain, generating the *mAID::dhhc2* clone (Fig S6A). This parasite displayed  
345 normal proliferation during asexual blood stages and the fusion protein mAID::DHHC2  
346 exhibited IMC localization in the schizonts (Fig S6B), indicating no detrimental effect  
347 of mAID tagging on DHHC2 localization and function. IAA treatment (1 mM for 3 h)  
348 of the *mAID::dhhc2* schizonts efficiently depleted the mAID::DHHC2 protein (Fig  
349 S6C). To determine whether IAA itself affects parasites development *in vivo*, mice  
350 infected with the 17XNL parasite were injected intraperitoneally with 200 mg/kg/day  
351 IAA or vehicle (DMSO) for 3 consecutive days. The *in vivo* parasitemia increased at an  
352 indistinguishable rate in both groups (Fig S6D), indicating no notable effect of IAA on  
353 parasite proliferation in mice. Next, we tested whether the parasite mAID::DHHC2  
354 protein could be depleted in mice. The mice with ~10% parasitemia of the *mAID::dhhc2*  
355 parasite were injected intraperitoneally with IAA once and the parasite-infected red  
356 blood cells were collected for immunoblot at 1 and 3 h after IAA injection (Fig S6E).  
357 The mAID::DHHC2 protein was significantly reduced in the parasites from IAA-  
358 treated mice, indicating successful mAID::DHHC2 degradation by IAA (Fig S6E). As  
359 a control, the IAA treatment had little effect on the 6HA::DHHC2 protein in the  
360 *6HA::dhhc2* parasite (Fig S6E).

361

362 To dissect the DHHC2 function *in vivo*, mice were infected with the *Tir1* or  
363 *mAID::dhhc2* schizonts which were pretreated with IAA or vehicle for 3 h *in vitro* to  
364 deplete DHHC2 (Figure 5A). From 12 h post infection, the parasitemia in mice infected  
365 with *Tir1* and *mAID::dhhc2* was monitored in parallel every 12 h. The parasitemia of  
366 *Tir1* increased at an equal rate after either IAA or vehicle pretreatment (Figure 5B, left

367 [panel](#)). However, the IAA-pretreated *mAID::dhhc2* parasite displayed delayed  
368 proliferation compared to the parasite pretreated with vehicle ([Figure 5B, right panel](#)).  
369 The parasite with IAA-pretreatment emerged in the mouse blood at 96 h post infection  
370 while the parasite with vehicle-pretreatment emerged at 36 h. Notably, continuation of  
371 DHHC2 depletion by another IAA injection (IAA+) at time of parasite infection  
372 resulted in complete suppression of *mAID::dhhc2* in mice ([Figure 5B, right panel](#)),  
373 while this treatment had no effect on the proliferation of *Tir1* ([Figure 5B, left panel](#)).  
374 These results provided a direct evidence that DHHC2 is essential for the asexual blood  
375 stage development in mice.

376

### 377 **DHHC2 regulates schizont segmentation**

378 Because DHHC2 is specifically expressed in the schizonts, we speculated that DHHC2  
379 regulates schizont development. A mixture of early stage parasites (rings and early  
380 trophozoites) was purified using Nycodenz centrifugation and cultured for 12 h to  
381 mature schizonts using an *in vitro* culture method [57] ([Figure 5C](#)). We evaluated the  
382 effect of DHHC2 depletion on schizont development by counting the mature schizonts  
383 using Giemsa staining. The IAA-treated *Tir1* parasite developed to mature schizonts at  
384 a similar level as the vehicle-treated *Tir1* parasite, indicating no effect of IAA alone on  
385 the schizont development ([Figure 5D and E](#)). However, IAA treatment severely  
386 decreased the formation of mature schizonts in the *mAID::dhhc2* parasite ([Figure 5D](#)  
387 [and E](#)). Importantly, the treated *mAID::dhhc2* parasite had apparent nuclear replication  
388 but failed to segregate into individual merozoites. This result suggests arrest of schizont  
389 cytokinesis or segmentation after nuclear multiplication. In addition, treatment with the  
390 PAT inhibitor 2-BP resulted in no formation of mature schizonts in either *Tir1* or  
391 *mAID::dhhc2* parasites ([Figure 5D and E](#)), which is in agreement with the previous  
392 reports [53].

393

394 To further examine the defects within the schizonts, the *mAID::dhhc2* parasite was co-  
395 stained with the nuclear dye and an antibody against the merozoite surface protein  
396 MSP1, which coats the parasite PM of newly formed daughter merozoites after

397 segmentation [58]. Hoechst signals in the schizonts showed no notable difference  
398 between the IAA- and vehicle-treated groups (Figure 5F and G), indicating normal  
399 nuclear DNA multiplication in the DHHC2-deficient (IAA-treated) parasites. However,  
400 MSP1 staining revealed that the schizonts of DHHC2-deficient group had agglomerates  
401 of daughter cells that failed to separate (Figure 5F) while the schizonts of the vehicle  
402 control group exhibited normal morphology (Figure 5F). Expression and cleavage  
403 (from ~200 to 42 kD) of full length MSP1 have been used to indicate schizont  
404 maturation and merozoite ready-to-egress from erythrocytes [59, 60]. Consistent with  
405 an impaired schizont development, an immunoblot of the IAA-treated parasite showed  
406 reduced MSP1 expression and processing compared to the vehicle control (Figure 5H).

407

408 Next, using transmission electron microscopy (TEM), we examined the ultra-structure  
409 of the *mAID::dhhc2* schizonts produced after the 12 h *in vitro* maturation in the  
410 presence of the vehicle, IAA, or 2-BP. The daughter cells were normally segmented in  
411 the schizonts of the vehicle-treated group, forming fully separated daughter merozoites  
412 (Figure 5I). However, severe morphological defects occurred in the DHHC2-deficient  
413 parasites. Large daughter cell agglomerates were observed in the center of most  
414 schizonts although a few mononucleated daughter merozoites were formed (Figure 5I).  
415 This segmentation arrest resulted in significant fewer daughter merozoites in the  
416 DHHC2-deficient schizonts compared to the control (Figure 5J). Interestingly, we  
417 observed the incomplete IMC beneath the PM in some daughter merozoites and the  
418 agglomerates within the DHHC2-deficient schizonts (Figure 5I), suggesting no  
419 remarkable effect of DHHC2 depletion in the initial biogenesis of the IMC. In addition,  
420 the organelles including possible rhoptries or micronemes were observed in the large  
421 agglomerates of the DHHC2-deficient schizonts, suggesting normal biogenesis and  
422 development of these organelles but a defect in allocation of daughter merozoites  
423 during schizont segmentation. As a control, the 2-BP treatment completely blocked  
424 schizont segmentation (Figure 5I).

425

426 **DHHC2 also controls merozoite invasion**

427 Upon schizont maturation, merozoites egress from the erythrocyte to invade new  
428 erythrocytes. To investigate DHHC2 function in merozoite invasion, we collected the  
429 merozoites released from the mechanically disrupted mature schizonts, which undergo  
430 natural rupture in an extremely low efficacy under the *in vitro* condition for the *P. yoelii*.  
431 Released merozoites were capable of invading the erythrocytes in mice, indicative of  
432 merozoite's viability and activity. The merozoites collected from the IAA- or vehicle-  
433 treated schizonts were injected intravenously into mice and the number of the ring stage  
434 parasites indicative of successful invasion was counted by flow cytometry and light  
435 microscopy (Figure S7A). At 20 min post injection, the number of newly developed  
436 rings was significantly lower in the IAA-treated group compared with the vehicle-  
437 treated group (Figure S7B and C). As a control, the IAA treatment had no effect on  
438 merozoite invasion of the *Tir1* parasite (Figure S7 B and C). Taking all the results  
439 together, DHHC2 has an important function in both schizont segmentation and  
440 merozoite invasion, two processes during which the parasites possess IMC.

441

#### 442 **DHHC2 palmitoylates GAP45 and CDPK1**

443 GAP45 and CDPK1 are essential for the asexual blood stage development of *P.*  
444 *falciparum* [11, 18, 21]. Additionally, palmitoylation regulates IMC targeting of these  
445 proteins in the schizonts and merozoites (Figure 3E). We speculated that DHHC2 exerts  
446 its function via palmitoylating GAP45 and CDPK1. To test this hypothesis, the  
447 palmitoylation and localization of GAP45 and CDPK1 were examined in the DHHC2-  
448 deficient schizonts after pretreating with IAA at 1 mM for 12 h. The palmitoylation  
449 level of GAP45 and CDPK1 was significantly reduced in the DHHC2-deficient  
450 schizonts compared to the vehicle control (Figure 6A). Notably, both GAP45 and  
451 CDPK1 lost their typical IMC localization in both the schizonts and the released  
452 merozoites of the DHHC2-deficient parasite (Figure 6C and D). In contrast, PhIL1  
453 retained the IMC localization in the DHHC2-deficient parasite (Figure 6C), consistent  
454 with the fact that PhIL1 is not palmitoylated (Figure 4C). The distribution of MSP1 in  
455 the DHHC2-deficient schizonts was also unaffected (Figure 6C). In agreement with the  
456 changes in subcellular distribution of proteins by IFA, the detergent extraction-based



457 protein solubility assay also revealed that GAP45 and CDPK1 lost their membrane  
458 association upon the depletion of DHHC2 by IAA (Figure 6E).

459

460 Besides DHHC2, DHHC1 also displayed IMC localization in the schizonts although it  
461 is expressed at lower abundance (Figure 4B and C). To investigate whether DHHC1  
462 also contributes to the palmitoylation of GAP45 and CDPK1, we generated the  
463 *dhhc1::mAID* parasite clone in which the C-terminus of endogenous DHHC1 was  
464 tagged with the mAID::HA module in the *Tir1* strain (Fig. S6A and B). IAA treatment  
465 depleted the DHHC1::mAID protein in the *dhhc1::mAID* schizonts (Fig. S6C), but had  
466 little impact on the palmitoylation level of GAP45 and CDPK1 (Figure 6B). These  
467 results indicated that DHHC2, but not DHHC1, contributes to the palmitoylation of  
468 GAP45 and CDPK1 in the schizonts.

469

470 To further confirm DHHC2 as the enzyme capable of palmitoylating GAP45 and  
471 CDPK1, we transfected constructs encoding HA-tagged human codon optimized  
472 DHHC2 (DHHC2-HA), GAP45 and CDPK1 into the human HEK293T cells. Indeed,  
473 the ectopically expressed GAP45 and CDPK1 could be palmitoylated by co-transfected  
474 DHHC2-HA, while the PAT catalytic-deficient mutant protein DHHC2/C128A-HA  
475 failed to palmitoylate GAP45 and CDPK1 (Figure 6F). As a control, the palmitoylation  
476 of co-transfected mouse CD36 protein, which was reported to be constitutively  
477 palmitoylated in HEK293T [61], was independent of *Plasmodium* DHHC2 (Figure 6F).  
478 The palmitoylation of GAP45 and CDPK1 was also significantly reduced in HEK293T  
479 culture treated with inhibitor 2-BP (Figure 6G). These results in human cells replicate  
480 the observations of DHHC2 activity in the *Plasmodium* schizonts and demonstrate the  
481 ability of DHHC2 to palmitoylate GAP45 and CDPK1.

482

### 483 **Residues for palmitoylation in GAP45 and CDPK1**

484 To identify the residue(s) of palmitoylation in GAP45, we used an online software CSS-  
485 Palm ([csspalm.biocuckoo.org](http://csspalm.biocuckoo.org)) for prediction, which generated 6 candidate cysteines  
486 (C5, C140, C156, C158, C169, and C172) (Figure 7A). To test them, we initially

487 generated 4 constructs expressing HA-tagged GAP45, each with a single or double  
488 cysteine-to-alanine mutations (C5A, C140A, C156A/C158A, and C169A/C172A)  
489 (Figure 7A, Fig S8A and B). These constructs were episomally expressed in the  
490 schizonts. Only the C140A mutant displayed the IMC localization similar to wildtype  
491 (WT) GAP45; other mutants (C5A, C156A/C158A, and C169A/C172A) lost the IMC  
492 localization (Figure 7B). These results suggest that these cysteines (C5, C156 and/or  
493 C158, C169 and/or C172) are critical for IMC targeting of GAP45 and might be the  
494 residues for modification. Indeed, the Acyl-RAC assay detected significantly decreased  
495 palmitoylation of GAP45 in the C5A, C156A/C158A, and C169A/C172A mutants, but  
496 not the C140A mutant. Thus, for GAP45, there is an association between IMC  
497 localization and palmitoylation. Additionally, the degree of palmitoylation was further  
498 reduced in the triple cysteine mutants (C5A/C156A/C158A and C5A/C169A/C172A)  
499 relative to the single and double mutants (Figure 7C).

500

501 In CDPK1, two cysteines (C3 and C252) were predicted as the potential residues for  
502 palmitoylation (Figure 7D). Using the same approach, we found that only the C3A  
503 mutation caused a complete loss in both protein palmitoylation and IMC targeting of  
504 CDPK1 in the schizonts while the C252A mutation had no effect (Figure 7E-F),  
505 suggesting C3 as the critical residue for protein palmitoylation and IMC targeting of  
506 CDPK1 in schizonts. Interestingly, the cysteine residues C5, C156, C158, C169, and  
507 C172 of GAP45 and C3 of CDPK1 are evolutionarily conserved among different  
508 *Plasmodium* species (Fig S8A and C). Together, these results suggest that C5, C156,  
509 C158, C169, and C172 of GAP45 and C3 of CDPK1 are residues for palmitoylation  
510 which direct IMC targeting of the proteins in schizonts.

511

### 512 **Palmitoylation in GAP45 and CDPK1 is essential for parasite viability**

513 Lastly we asked whether the palmitoylation in GAP45 and CDPK1 is essential for  
514 protein function and thus parasite viability. The above cysteine to alanine mutation  
515 experiments indicated that the palmitoylation of the N-terminal cysteine (C5 in GAP45  
516 and C3 in CDPK1) is required for the correct IMC targeting of proteins. We attempted

517 to replace the C5 with alanine in the endogenous GAP45 of 17XNL parasite. A 742 bp  
518 DNA donor template containing the nucleotide substitution was used for homologous  
519 replacement (Fig S9C). Seven sgRNAs were designed for guiding the Cas9 complex to  
520 the target DNA. After three independent transfections with each of these seven  
521 Cas9/sgRNA plasmids, we failed to obtain the GAP45 C5A mutant parasites. In contrast,  
522 a control mutant parasite clone GAP45 C5C was generated with a silent mutation still  
523 encoding C5 (Fig S8E). Using the same approach, we attempted to replace the C3 with  
524 A in the endogenous CDPK1 of 17XNL parasite (Fig S9C). Similarly, only mutant  
525 parasite clones with CDPK1 C3C, but not CDPK1 C3A, were generated (Fig S8F).  
526 Together, these results suggest that palmitoylation of C5 in GAP45 and C3 in CDPK1  
527 is essential for protein function and parasite viability in the asexual blood stage  
528 development.

529

## 530 Discussion

531 In this study, we attempted a proteome analysis of IMC in the schizonts using the biotin  
532 ligase TurboID-mediated PL. Besides abundant proteins relatively easily detected by  
533 conventional immunoprecipitation, PL enables detection of proteins with weak or  
534 transient interactions. TurboID achieved satisfactory biotinylation in 1 h, which is much  
535 shorter than the 18 h needed by the BioID. To our knowledge, this is the first application  
536 of TurboID-based PL in the *Plasmodium*. We obtained a list of 300 Tb-IMC interacting  
537 proteins in the schizonts of *P. yoelii*. Among these proteins, 297 have orthologs in the  
538 *P. falciparum* (Table S1), suggesting a conserved protein composition of IMC in the  
539 schizonts of rodent and human malaria parasites. Although the collection of 300  
540 proteins may contain some false positives, two lines of evidence suggest good reliability  
541 of this IMC proteome. Firstly, about 50 IMC or IMC-associated proteins have been  
542 identified in the *Plasmodium* to date [5, 30]. Among these, 30 proteins (60%) have  
543 orthologs included in the Tb-IMC interacting proteins (Table S1). The absence of  
544 certain known IMC or IMC-associated proteins in the collection of Tb-IMC interacting  
545 proteins may attribute to the following reasons: restricted labeling radius of TurboID,

546 lack of lysines for biotinylation, sterically inaccessibility of proteins by TurboID, or  
547 protein expression in other parasite stages [62]. Secondly, subcellular localization  
548 analysis of 22 candidates confirmed IMC localization of 8 known and 11 previously  
549 undescribed proteins. The localization results strongly suggest a predominantly IMC  
550 localization of the proteins tested, although the precise localization at the parasite  
551 plasma membrane or subpellicular microtubules cannot be differentiated because of  
552 close proximity between IMC and these structures. Exact localization of these proteins  
553 at the parasite pellicle need to be determined in the future using other methods, such as  
554 super resolution imaging, immunoelectron microscopy, or split green fluorescent  
555 protein. We noted that Wichers *et al* recently explored an IMC proteome in asexual  
556 blood stages of *P. falciparum* with BioID using PhIL1 as the bait [30]. Of the 225  
557 PhIL1-interacting protein candidates, the orthologs of 37 proteins are listed among the  
558 300 Tb-IMC interacting proteins in our study (Table S1). We speculate that the  
559 differences in protein quantity and depth by proximity labeling are probably attributed  
560 to the species of biotin ligase, expression abundance of ligase, and the bait strategy.  
561

562 PL experiments could produce a considerable number of false positives if proper  
563 controls are not included for ratiometric or statistical analysis [24]. In a rational design,  
564 the PL enzyme is fused to the protein bait of interest while the PL enzyme alone works  
565 as a reference control [24]. To achieve the PL of IMC, the TurboID ligase is fused to a  
566 signal peptide (N-terminal 20 aa of ISP1) [17], directing the IMC targeting of ligase  
567 (Tb-IMC) through the ER/Golgi secretory pathway. It is worth noting that the  
568 cytoplasm-facing feature of Tb-IMC ligase may prevent the detection of proteins in the  
569 IMC lumen. Background levels of ligase activity are set by a ligase not fused to the  
570 signal peptide. This ligase (Tb-cyto), as a spatial reference control, would not enter the  
571 ER/Golgi secretory pathway but instead stays in the cytosol. Therefore, the Tb-IMC  
572 likely measures both interactions with the IMC proteins and interactions with the  
573 secretory pathway. Indeed, the 300 Tb-IMC interacting proteins were segregated into  
574 two distinct subgroups based on interaction network (Figure 1E). Most of known IMC  
575 or IMC-associated proteins were clustered into the subgroup I. In contrast, the subgroup

576 II included many ER/Golgi secretory pathway-related proteins. The major role of the  
577 subgroup I proteins is likely in IMC function while the major role of the subgroup II  
578 proteins is likely in the secretory pathway. It is possible that some Tb-IMC interacting  
579 proteins may have roles in both IMC and secretory pathway. Detection of the subgroup  
580 II proteins in this study provided another independent evidence supporting the IMC  
581 formation from the ER/Golgi-derived secretory system. In addition, concomitant  
582 capture of subgroup I and II as the Tb-IMC interacting proteins may reflect the tight  
583 and dynamic association between IMC organelle and endomembrane system in the  
584 schizont development.

585

586 The list of increased IMC proteins allowed us to investigate the localization  
587 determinant(s) of IMC proteins which had remained unclear. Several mechanisms  
588 underlying IMC targeting have been proposed, including vesicle-mediated transporting  
589 of proteins containing a signal peptide, IMC membrane trapping of proteins with lipid  
590 modification, protein motif (alveolin repeats)-mediated IMC localization, and protein-  
591 protein interaction for IMC targeting [3]. Palmitoylation is a post-translation  
592 modification in which a cysteine residue undergoes a reversible lipid modification,  
593 regulating localization and function of target proteins [63]. Previous studies have  
594 implied that palmitoylation mediates the binding or trafficking of proteins to the IMC  
595 [17, 35]. In *T. gondii*, many glideosome-associated proteins were also palmitoylated  
596 [64]. Interestingly, out of the 300 *P. yoelii* Tb-IMC interacting proteins, 83 (28%) have  
597 orthologs of the *P. falciparum* palmitoylated proteins in the schizonts of [53]. These 83  
598 proteins include GAP45 and ISP3 with validated palmitoylation and CDPK1, GAP50,  
599 IMC1g, and IMC1c with predicted palmitoylation. These results imply that a high  
600 proportion of IMC proteins are palmitoylated. Palmitoylation of these proteins may be  
601 critical for their localization and function. Interaction of these palmitoylated IMC  
602 proteins with other non-palmitoylated proteins may also mediate the IMC localization  
603 of the latter.

604

605 11 putative PATs (DHHC1–11) are encoded in the genomes of rodent malaria parasites

606 while there are 12 PATs (DHHC1-12) in *P. falciparum* [39]. So far, viable mutant clones  
607 were obtained for only DHHC3, DHHC5, DHHC9, and DHHC10 in previous knockout  
608 attempts [65-67], suggesting other PATs (DHHC1, DHHC2, DHHC4, DHHC6,  
609 DHHC7, DHHC8, DHHC11, and DHHC12) may be essential for the asexual blood  
610 stage development. However, the association of these PATs with IMC has not been  
611 investigated in the schizonts. In this study, DHHC2 and DHHC1 are among the 300 Tb-  
612 IMC interacting proteins and both displayed clear IMC localization in the schizonts.  
613 Protein abundance assays and STRING analysis suggested that DHHC2 is likely the  
614 main mediator of palmitoylation of the IMC proteins in the schizonts. To determine if  
615 DHHC2 contributes to parasite development *in vivo*, we developed a method for  
616 investigating its function in the infected mice. Induced depletion of DHHC2 resulted in  
617 a complete growth arrest of the engineered strain *mAID::dhhc2* in mice in an IAA  
618 dosage-dependent manner, confirming the essentiality of DHHC2 in the asexual blood  
619 stage. In *in vitro* culture, we observed a significant decrease, but not complete ablation  
620 of mature schizont formation in DHHC2-depleted parasites. Most parasites were  
621 arrested at a stage earlier than the mature schizont due to defective segmentation or  
622 cytokinesis. The defect in asexual blood stage development *in vivo* and *in vitro* caused  
623 by the loss of DHHC2 was associated with impairment of IMC localization of certain  
624 IMC proteins. Indeed, among the 83 potentially palmitoylated IMC proteins, our  
625 analysis validated CDPK1 and GAP45 as substrates of DHHC2, but not DHHC1. Aside  
626 from CDPK1 and GAP45, other IMC protein substrates palmitoylated by DHHC2  
627 remain to be validated. We previously reported that DHHC2 is critical for parasite  
628 development during the zygote-to-ookinete morphogenesis in the mosquito, and  
629 DHHC2 palmitoylates ISP1 and ISP3 for their attachment to the IMC to facilitate  
630 connection between the IMC and the SPMT [17]. Therefore, DHHC2 plays critical roles  
631 in IMC targeting of many proteins at multiple developmental stages.

632

633 Compared to the reduction in the *mAID::dhhc2* schizonts caused by IAA treatment, the  
634 treatment with 2-BP, a broad-spectrum inhibitor of protein palmitoylation, resulted in  
635 no formation of mature *mAID::dhhc2* schizonts (Figure 6D and E). The effects of IAA

636 are specific to the mAID-fused DHHC2 in the *mAID::dhhc2* schizonts, whereas 2-BP  
637 could inhibit protein palmitoylation mediated by DHHC2 and other PATs, including  
638 DHHC1. We suspect that the IMC-residing DHHC1 is also essential for schizont  
639 development, but its precise roles and substrate proteins also awaits investigation in the  
640 future.

641

642 Besides the PATs DHHC2 and DHHC1, several kinases including CDPK1, CDPK4,  
643 and PKA, were also found among the Tb-IMC interacting proteins. CDPK1, CDPK4,  
644 and PKA were further validated to localize at the IMC of *P. yoelii*, in accordance with  
645 their orthologs' localization in *P. falciparum* [18, 48, 49]. CDPK1 has been reported to  
646 be essential for schizont development. Both conditional knockdown and inhibition of  
647 CDPK1 can arrest *P. falciparum* schizont development [18, 21], mimicking the  
648 phenotypes of the DHHC2-depleted parasites in this study. Interestingly,  
649 phosphoproteomic analysis revealed that the conditional knockdown of CDPK1 led to  
650 the hypophosphorylation of several IMC and glideosome proteins, including GAP45,  
651 MTIP, and PKA regulatory subunit (PKAr) [18, 49, 68, 69]. In this study, we found that  
652 DHHC2-mediated palmitoylation is required for CDPK1 localization at IMC. Thus  
653 palmitoylation and IMC localization are the prerequisites for CDPK1-mediated  
654 phosphorylation of IMC proteins. Based on all available data, we speculated that once  
655 the IMC biogenesis is initiated in early schizonts, DHHC2 is recruited to the nascent  
656 IMC, possibly by an auto-palmitoylation mechanism [17]. However, DHHC2 seems  
657 inessential for IMC biogenesis because the IMC seemed morphologically normal  
658 despite DHHC2 depletion (Figure 5I). In contrast, DHHC2 palmitoylates certain  
659 important proteins for their IMC localization in the developing schizonts and mature  
660 merozoites. It has critical function in schizont cytokinesis and erythrocyte invasion.

661

## 662 **Acknowledgments**

663 This work was supported by the National Natural Science Foundation of China  
664 (32170427, 31970387, 31872214), the Natural Science Foundation of Fujian Province



665 (2021J01028, 2019J05010), and the 111 Project sponsored by the State Bureau of  
666 Foreign Experts and Ministry of Education of China (BP2018017).

667

## 668 **Author contributions**

669 Q.PG. and W.X. generated the modified parasites, conducted the phenotype analysis,  
670 IFA assay, image analysis, TEM experiments, and biochemical experiments. Z.CQ.  
671 conducted the MS and data analysis. C.MY. and W.JX. generated the modified parasites.  
672 Y.J. and C.HT, supervised the work. Q.PG, L.J, C.HT, and Y.J. analyzed the data, W.N.  
673 revised the manuscript, and Y.J. wrote the manuscript.

674

## 675 **Declaration of Interests**

676 The authors declare no competing interests

677

## 678 **References**

- 679 1. Organization, W.H. (2019). World malaria report 2019. (Geneva: World Health Organization).
- 680 2. Morrissette, N.S., and Sibley, L.D. (2002). Cytoskeleton of apicomplexan parasites.  
681 *Microbiology and molecular biology reviews* : MMBR 66, 21-38; table of contents.
- 682 3. Kono, M., Herrmann, S., Loughran, N.B., Cabrera, A., Engelberg, K., Lehmann, C., Sinha, D.,  
683 Prinz, B., Ruch, U., Heussler, V., et al. (2012). Evolution and architecture of the inner membrane  
684 complex in asexual and sexual stages of the malaria parasite. *Mol Biol Evol* 29, 2113-2132.
- 685 4. Matthews, H., Duffy, C.W., and Merrick, C.J. (2018). Checks and balances? DNA replication  
686 and the cell cycle in Plasmodium. *Parasit Vectors* 11, 216.
- 687 5. Ferreira, J.L., Heincke, D., Wichers, J.S., Liffner, B., Wilson, D.W., and Gilberger, T.W. (2020).  
688 The Dynamic Roles of the Inner Membrane Complex in the Multiple Stages of the Malaria  
689 Parasite. *Front Cell Infect Microbiol* 10, 611801.
- 690 6. Kono, M., Heincke, D., Wilcke, L., Wong, T.W., Bruns, C., Herrmann, S., Spielmann, T., and  
691 Gilberger, T.W. (2016). Pellicle formation in the malaria parasite. *J Cell Sci* 129, 673-680.
- 692 7. Frenal, K., and Soldati-Favre, D. (2013). [The glideosome, a unique machinery that assists the  
693 Apicomplexa in gliding into host cells]. *Med Sci (Paris)* 29, 515-522.
- 694 8. Harding, C.R., and Frischknecht, F. (2020). The Riveting Cellular Structures of Apicomplexan  
695 Parasites. *Trends Parasitol* 36, 979-991.
- 696 9. Frenal, K., Dubremetz, J.F., Lebrun, M., and Soldati-Favre, D. (2017). Gliding motility powers  
697 invasion and egress in Apicomplexa. *Nat Rev Microbiol* 15, 645-660.
- 698 10. Gould, S.B., Tham, W.H., Cowman, A.F., McFadden, G.I., and Waller, R.F. (2008). Alveolins,  
699 a new family of cortical proteins that define the protist infrakingdom Alveolata. *Mol Biol Evol*  
700 25, 1219-1230.

- 701 11. Perrin, A.J., Collins, C.R., Russell, M.R.G., Collinson, L.M., Baker, D.A., and Blackman, M.J.  
702 (2018). The Actinomyosin Motor Drives Malaria Parasite Red Blood Cell Invasion but Not  
703 Egress. *mBio* 9.
- 704 12. Frenal, K., Polonais, V., Marq, J.B., Stratmann, R., Limenitakis, J., and Soldati-Favre, D. (2010).  
705 Functional dissection of the apicomplexan glideosome molecular architecture. *Cell Host*  
706 *Microbe* 8, 343-357.
- 707 13. Bosch, J., Paige, M.H., Vaidya, A.B., Bergman, L.W., and Hol, W.G. (2012). Crystal structure  
708 of GAP50, the anchor of the invasion machinery in the inner membrane complex of *Plasmodium*  
709 *falciparum*. *J Struct Biol* 178, 61-73.
- 710 14. Bergman, L.W., Kaiser, K., Fujioka, H., Coppens, I., Daly, T.M., Fox, S., Matuschewski, K.,  
711 Nussenzweig, V., and Kappe, S.H. (2003). Myosin A tail domain interacting protein (MTIP)  
712 localizes to the inner membrane complex of *Plasmodium* sporozoites. *J Cell Sci* 116, 39-49.
- 713 15. Green, J.L., Wall, R.J., Vahokoski, J., Yusuf, N.A., Ridzuan, M.A.M., Stanway, R.R., Stock, J.,  
714 Knuepfer, E., Brady, D., Martin, S.R., et al. (2017). Compositional and expression analyses of  
715 the glideosome during the *Plasmodium* life cycle reveal an additional myosin light chain  
716 required for maximum motility. *J Biol Chem* 292, 17857-17875.
- 717 16. Bullen, H.E., Tonkin, C.J., O'Donnell, R.A., Tham, W.H., Papenfuss, A.T., Gould, S., Cowman,  
718 A.F., Crabb, B.S., and Gilson, P.R. (2009). A novel family of Apicomplexan glideosome-  
719 associated proteins with an inner membrane-anchoring role. *J Biol Chem* 284, 25353-25363.
- 720 17. Wang, X., Qian, P., Cui, H., Yao, L., and Yuan, J. (2020). A protein palmitoylation cascade  
721 regulates microtubule cytoskeleton integrity in *Plasmodium*. *EMBO J* 39, e104168.
- 722 18. Kumar, S., Kumar, M., Ekka, R., Dvorin, J.D., Paul, A.S., Madugundu, A.K., Gilberger, T.,  
723 Gowda, H., Duraisingh, M.T., Keshava Prasad, T.S., et al. (2017). PfCDPK1 mediated signaling  
724 in erythrocytic stages of *Plasmodium falciparum*. *Nat Commun* 8, 63.
- 725 19. Saini, E., Zeeshan, M., Brady, D., Pandey, R., Kaiser, G., Koreny, L., Kumar, P., Thakur, V.,  
726 Tatiya, S., Katris, N.J., et al. (2017). Photosensitized INA-Labelled protein 1 (PhIL1) is novel  
727 component of the inner membrane complex and is required for *Plasmodium* parasite  
728 development. *Sci Rep* 7, 15577.
- 729 20. Morano, A.A., and Dvorin, J.D. (2021). The Ringleaders: Understanding the Apicomplexan  
730 Basal Complex Through Comparison to Established Contractile Ring Systems. *Front Cell Infect*  
731 *Microbiol* 11, 656976.
- 732 21. Azevedo, M.F., Sanders, P.R., Krejany, E., Nie, C.Q., Fu, P., Bach, L.A., Wunderlich, G., Crabb,  
733 B.S., and Gilson, P.R. (2013). Inhibition of *Plasmodium falciparum* CDPK1 by conditional  
734 expression of its J-domain demonstrates a key role in schizont development. *Biochem J* 452,  
735 433-441.
- 736 22. Kim, D.I., and Roux, K.J. (2016). Filling the Void: Proximity-Based Labeling of Proteins in  
737 Living Cells. *Trends Cell Biol* 26, 804-817.
- 738 23. Roux, K.J., Kim, D.I., Raida, M., and Burke, B. (2012). A promiscuous biotin ligase fusion  
739 protein identifies proximal and interacting proteins in mammalian cells. *J Cell Biol* 196, 801-  
740 810.
- 741 24. Qin, W., Cho, K.F., Cavanagh, P.E., and Ting, A.Y. (2021). Deciphering molecular interactions  
742 by proximity labeling. *Nat Methods* 18, 133-143.
- 743 25. Geiger, M., Brown, C., Wichers, J.S., Strauss, J., Lill, A., Thuenauer, R., Liffner, B., Wilcke, L.,  
744 Lemcke, S., Heincke, D., et al. (2020). Structural Insights Into PfARO and Characterization of

- 745 its Interaction With PfAIP. *J Mol Biol* 432, 878-896.
- 746 26. Boucher, M.J., Ghosh, S., Zhang, L., Lal, A., Jang, S.W., Ju, A., Zhang, S., Wang, X., Ralph,  
747 S.A., Zou, J., et al. (2018). Integrative proteomics and bioinformatic prediction enable a high-  
748 confidence apicoplast proteome in malaria parasites. *PLoS Biol* 16, e2005895.
- 749 27. Schnider, C.B., Bausch-Fluck, D., Bruhlmann, F., Heussler, V.T., and Burda, P.C. (2018). BioID  
750 Reveals Novel Proteins of the Plasmodium Parasitophorous Vacuole Membrane. *mSphere* 3.
- 751 28. Khosh-Naucke, M., Becker, J., Mesen-Ramirez, P., Kiani, P., Birnbaum, J., Frohlike, U.,  
752 Jonscher, E., Schluter, H., and Spielmann, T. (2018). Identification of novel parasitophorous  
753 vacuole proteins in *P. falciparum* parasites using BioID. *Int J Med Microbiol* 308, 13-24.
- 754 29. Kehrer, J., Frischknecht, F., and Mair, G.R. (2016). Proteomic Analysis of the Plasmodium  
755 berghei Gametocyte Egressome and Vesicular bioID of Osmiophilic Body Proteins Identifies  
756 Merozoite TRAP-like Protein (MTRAP) as an Essential Factor for Parasite Transmission. *Mol*  
757 *Cell Proteomics* 15, 2852-2862.
- 758 30. Wichers, J.S., Wunderlich, J., Heincke, D., Pazicky, S., Strauss, J., Schmitt, M., Kimmel, J.,  
759 Wilcke, L., Scharf, S., von Thien, H., et al. (2021). Identification of novel inner membrane  
760 complex and apical annuli proteins of the malaria parasite Plasmodium falciparum. *Cell*  
761 *Microbiol*, e13341.
- 762 31. May, D.G., Scott, K.L., Campos, A.R., and Roux, K.J. (2020). Comparative Application of  
763 BioID and TurboID for Protein-Proximity Biotinylation. *Cells* 9.
- 764 32. Bosch, J.A., Chen, C.L., and Perrimon, N. (2021). Proximity-dependent labeling methods for  
765 proteomic profiling in living cells: An update. *Wiley Interdiscip Rev Dev Biol* 10, e392.
- 766 33. Branon, T.C., Bosch, J.A., Sanchez, A.D., Udeshi, N.D., Svinkina, T., Carr, S.A., Feldman, J.L.,  
767 Perrimon, N., and Ting, A.Y. (2018). Efficient proximity labeling in living cells and organisms  
768 with TurboID. *Nat Biotechnol* 36, 880-887.
- 769 34. Otto, T.D., Bohme, U., Jackson, A.P., Hunt, M., Franke-Fayard, B., Hoeijmakers, W.A., Religa,  
770 A.A., Robertson, L., Sanders, M., Ogun, S.A., et al. (2014). A comprehensive evaluation of  
771 rodent malaria parasite genomes and gene expression. *BMC Biol* 12, 86.
- 772 35. Wetzel, J., Herrmann, S., Swapna, L.S., Prusty, D., John Peter, A.T., Kono, M., Saini, S.,  
773 Nellimarla, S., Wong, T.W., Wilcke, L., et al. (2015). The role of palmitoylation for protein  
774 recruitment to the inner membrane complex of the malaria parasite. *J Biol Chem* 290, 1712-  
775 1728.
- 776 36. Li, Y., Zhong, C.Q., Xu, X., Cai, S., Wu, X., Zhang, Y., Chen, J., Shi, J., Lin, S., and Han, J.  
777 (2015). Group-DIA: analyzing multiple data-independent acquisition mass spectrometry data  
778 files. *Nat Methods* 12, 1105-1106.
- 779 37. Gillet, L.C., Navarro, P., Tate, S., Rost, H., Selevsek, N., Reiter, L., Bonner, R., and Aebersold,  
780 R. (2012). Targeted data extraction of the MS/MS spectra generated by data-independent  
781 acquisition: a new concept for consistent and accurate proteome analysis. *Mol Cell Proteomics*  
782 11, O111 016717.
- 783 38. Hu, G., Cabrera, A., Kono, M., Mok, S., Chaal, B.K., Haase, S., Engelberg, K., Cheemadan, S.,  
784 Spielmann, T., Preiser, P.R., et al. (2010). Transcriptional profiling of growth perturbations of  
785 the human malaria parasite Plasmodium falciparum. *Nat Biotechnol* 28, 91-98.
- 786 39. Hodson, N., Invergo, B., Rayner, J.C., and Choudhary, J.S. (2015). Palmitoylation and  
787 palmitoyl-transferases in Plasmodium parasites. *Biochemical Society transactions* 43, 240-245.
- 788 40. Parkyn Schneider, M., Liu, B., Glock, P., Suttie, A., McHugh, E., Andrew, D., Batinovic, S.,

- 789 Williamson, N., Hanssen, E., McMillan, P., et al. (2017). Disrupting assembly of the inner  
790 membrane complex blocks Plasmodium falciparum sexual stage development. *PLoS Pathog* *13*,  
791 e1006659.
- 792 41. Yeoman, J.A., Hanssen, E., Maier, A.G., Klonis, N., Maco, B., Baum, J., Turnbull, L.,  
793 Whitchurch, C.B., Dixon, M.W., and Tilley, L. (2011). Tracking Glideosome-associated protein  
794 50 reveals the development and organization of the inner membrane complex of Plasmodium  
795 falciparum. *Eukaryot Cell* *10*, 556-564.
- 796 42. Vaid, A., Thomas, D.C., and Sharma, P. (2008). Role of Ca<sup>2+</sup>/calmodulin-PfPKB signaling  
797 pathway in erythrocyte invasion by Plasmodium falciparum. *J Biol Chem* *283*, 5589-5597.
- 798 43. Dearnley, M.K., Yeoman, J.A., Hanssen, E., Kenny, S., Turnbull, L., Whitchurch, C.B., Tilley,  
799 L., and Dixon, M.W. (2012). Origin, composition, organization and function of the inner  
800 membrane complex of Plasmodium falciparum gametocytes. *J Cell Sci* *125*, 2053-2063.
- 801 44. Szklarczyk, D., Gable, A.L., Lyon, D., Junge, A., Wyder, S., Huerta-Cepas, J., Simonovic, M.,  
802 Doncheva, N.T., Morris, J.H., Bork, P., et al. (2019). STRING v11: protein-protein association  
803 networks with increased coverage, supporting functional discovery in genome-wide  
804 experimental datasets. *Nucleic Acids Res* *47*, D607-D613.
- 805 45. Pieperhoff, M.S., Schmitt, M., Ferguson, D.J., and Meissner, M. (2013). The role of clathrin in  
806 post-Golgi trafficking in *Toxoplasma gondii*. *PLoS One* *8*, e77620.
- 807 46. Gordon, J.L., Beatty, W.L., and Sibley, L.D. (2008). A novel actin-related protein is associated  
808 with daughter cell formation in *Toxoplasma gondii*. *Eukaryot Cell* *7*, 1500-1512.
- 809 47. Bannister, L.H., Hopkins, J.M., Fowler, R.E., Krishna, S., and Mitchell, G.H. (2000).  
810 Ultrastructure of rhoptry development in Plasmodium falciparum erythrocytic schizonts.  
811 *Parasitology* *121 (Pt 3)*, 273-287.
- 812 48. Fang, H., Gomes, A.R., Klages, N., Pino, P., Maco, B., Walker, E.M., Zenonos, Z.A., Angrisano,  
813 F., Baum, J., Doerig, C., et al. (2018). Epistasis studies reveal redundancy among calcium-  
814 dependent protein kinases in motility and invasion of malaria parasites. *Nat Commun* *9*, 4248.
- 815 49. Wilde, M.L., Triglia, T., Marapana, D., Thompson, J.K., Kouzmitchev, A.A., Bullen, H.E.,  
816 Gilson, P.R., Cowman, A.F., and Tonkin, C.J. (2019). Protein Kinase A Is Essential for Invasion  
817 of Plasmodium falciparum into Human Erythrocytes. *mBio* *10*.
- 818 50. Patil, H., Hughes, K.R., Lemgruber, L., Philip, N., Dickens, N., Starnes, G.L., and Waters, A.P.  
819 (2020). Zygote morphogenesis but not the establishment of cell polarity in Plasmodium berghei  
820 is controlled by the small GTPase, RAB11A. *PLoS Pathog* *16*, e1008091.
- 821 51. Green, J.L., Martin, S.R., Fielden, J., Ksagoni, A., Grainger, M., Yim Lim, B.Y., Molloy, J.E.,  
822 and Holder, A.A. (2006). The MTIP-myosin A complex in blood stage malaria parasites. *J Mol*  
823 *Biol* *355*, 933-941.
- 824 52. Fukata, Y., and Fukata, M. (2010). Protein palmitoylation in neuronal development and synaptic  
825 plasticity. *Nat Rev Neurosci* *11*, 161-175.
- 826 53. Jones, M.L., Collins, M.O., Goulding, D., Choudhary, J.S., and Rayner, J.C. (2012). Analysis  
827 of protein palmitoylation reveals a pervasive role in Plasmodium development and pathogenesis.  
828 *Cell Host Microbe* *12*, 246-258.
- 829 54. Forrester, M.T., Hess, D.T., Thompson, J.W., Hultman, R., Moseley, M.A., Stamler, J.S., and  
830 Casey, P.J. (2011). Site-specific analysis of protein S-acylation by resin-assisted capture. *J Lipid*  
831 *Res* *52*, 393-398.
- 832 55. Santos, J.M., Kehrer, J., Franke-Fayard, B., Frischknecht, F., Janse, C.J., and Mair, G.R. (2015).

- 833 The Plasmodium palmitoyl-S-acyl-transferase DHHC2 is essential for ookinete morphogenesis  
834 and malaria transmission. *Sci Rep* 5, 16034.
- 835 56. Liu, C., Yang, Z., Cai, M., Shi, Y., Cui, H., and Yuan, J. (2020). Generation of Plasmodium  
836 yoelii malaria parasite for conditional degradation of proteins. *Mol Biochem Parasitol*, 111346.
- 837 57. Janse, C.J., Ramesar, J., and Waters, A.P. (2006). High-efficiency transfection and drug selection  
838 of genetically transformed blood stages of the rodent malaria parasite Plasmodium berghei. *Nat*  
839 *Protoc* 1, 346-356.
- 840 58. Blackman, M.J., Scott-Finnigan, T.J., Shai, S., and Holder, A.A. (1994). Antibodies inhibit the  
841 protease-mediated processing of a malaria merozoite surface protein. *J Exp Med* 180, 389-393.
- 842 59. Child, M.A., Epp, C., Bujard, H., and Blackman, M.J. (2010). Regulated maturation of malaria  
843 merozoite surface protein-1 is essential for parasite growth. *Mol Microbiol* 78, 187-202.
- 844 60. Silmon de Monerri, N.C., Flynn, H.R., Campos, M.G., Hackett, F., Koussis, K., Withers-  
845 Martinez, C., Skehel, J.M., and Blackman, M.J. (2011). Global identification of multiple  
846 substrates for Plasmodium falciparum SUB1, an essential malarial processing protease. *Infect*  
847 *Immun* 79, 1086-1097.
- 848 61. Tao, N., Wagner, S.J., and Lublin, D.M. (1996). CD36 is palmitoylated on both N- and C-  
849 terminal cytoplasmic tails. *J Biol Chem* 271, 22315-22320.
- 850 62. Sanchez, A.D., Branon, T.C., Cote, L.E., Papagiannakis, A., Liang, X., Pickett, M.A., Shen, K.,  
851 Jacobs-Wagner, C., Ting, A.Y., and Feldman, J.L. (2021). Proximity labeling reveals non-  
852 centrosomal microtubule-organizing center components required for microtubule growth and  
853 localization. *Curr Biol* 31, 3586-3600 e3511.
- 854 63. Bijlmakers, M.J., and Marsh, M. (2003). The on-off story of protein palmitoylation. *Trends Cell*  
855 *Biol* 13, 32-42.
- 856 64. Foe, I.T., Child, M.A., Majmudar, J.D., Krishnamurthy, S., van der Linden, W.A., Ward, G.E.,  
857 Martin, B.R., and Bogyo, M. (2015). Global Analysis of Palmitoylated Proteins in Toxoplasma  
858 gondii. *Cell Host Microbe* 18, 501-511.
- 859 65. Hopp, C.S., Balaban, A.E., Bushell, E.S., Billker, O., Rayner, J.C., and Sinnis, P. (2016).  
860 Palmitoyl transferases have critical roles in the development of mosquito and liver stages of  
861 Plasmodium. *Cell Microbiol* 18, 1625-1641.
- 862 66. Santos, J.M., Duarte, N., Kehrer, J., Ramesar, J., Avramut, M.C., Koster, A.J., Dessens, J.T.,  
863 Frischknecht, F., Chevalley-Maurel, S., Janse, C.J., et al. (2016). Maternally supplied S-acyl-  
864 transferase is required for crystalloid organelle formation and transmission of the malaria  
865 parasite. *Proc Natl Acad Sci U S A* 113, 7183-7188.
- 866 67. Tay, C.L., Jones, M.L., Hodson, N., Theron, M., Choudhary, J.S., and Rayner, J.C. (2016). Study  
867 of Plasmodium falciparum DHHC palmitoyl transferases identifies a role for PfDHHC9 in  
868 gametocytogenesis. *Cell Microbiol* 18, 1596-1610.
- 869 68. Green, J.L., Rees-Channer, R.R., Howell, S.A., Martin, S.R., Knuepfer, E., Taylor, H.M.,  
870 Grainger, M., and Holder, A.A. (2008). The motor complex of Plasmodium falciparum:  
871 phosphorylation by a calcium-dependent protein kinase. *J Biol Chem* 283, 30980-30989.
- 872 69. Ridzuan, M.A., Moon, R.W., Knuepfer, E., Black, S., Holder, A.A., and Green, J.L. (2012).  
873 Subcellular location, phosphorylation and assembly into the motor complex of GAP45 during  
874 Plasmodium falciparum schizont development. *PLoS One* 7, e33845.
- 875 70. Leung, J.M., He, Y., Zhang, F., Hwang, Y.C., Nagayasu, E., Liu, J., Murray, J.M., and Hu, K.  
876 (2017). Stability and function of a putative microtubule-organizing center in the human parasite

- 877 *Toxoplasma gondii*. *Mol Biol Cell* 28, 1361-1378.
- 878 71. Zhang, C., Xiao, B., Jiang, Y., Zhao, Y., Li, Z., Gao, H., Ling, Y., Wei, J., Li, S., Lu, M., et al.  
879 (2014). Efficient editing of malaria parasite genome using the CRISPR/Cas9 system. *MBio* 5,  
880 e01414-01414.
- 881 72. Magi, B., and Liberatori, S. (2005). Immunoblotting techniques. *Methods Mol Biol* 295, 227-  
882 254.
- 883 73. da Veiga Leprevost, F., Haynes, S.E., Avtonomov, D.M., Chang, H.Y., Shanmugam, A.K.,  
884 Mellacheruvu, D., Kong, A.T., and Nesvizhskii, A.I. (2020). Philosopher: a versatile toolkit for  
885 shotgun proteomics data analysis. *Nat Methods* 17, 869-870.
- 886 74. Wang, D., Gan, G., Chen, X., and Zhong, C.Q. (2021). QuantPipe: A User-Friendly Pipeline  
887 Software Tool for DIA Data Analysis Based on the OpenSWATH-PyProphet-TRIC Workflow.  
888 *J Proteome Res* 20, 1096-1102.
- 889 75. Rosenberger, G., Bludau, I., Schmitt, U., Heusel, M., Hunter, C.L., Liu, Y., MacCoss, M.J.,  
890 MacLean, B.X., Nesvizhskii, A.I., Pedrioli, P.G.A., et al. (2017). Statistical control of peptide  
891 and protein error rates in large-scale targeted data-independent acquisition analyses. *Nat*  
892 *Methods* 14, 921-927.
- 893 76. Tyanova, S., Temu, T., Sinitcyn, P., Carlson, A., Hein, M.Y., Geiger, T., Mann, M., and Cox, J.  
894 (2016). The Perseus computational platform for comprehensive analysis of (prote)omics data.  
895 *Nat Methods* 13, 731-740.
- 896 77. Tupper, J., Stratford, M.R., Hill, S., Tozer, G.M., and Dachs, G.U. (2010). In vivo  
897 characterization of horseradish peroxidase with indole-3-acetic acid and 5-bromoindole-3-  
898 acetic acid for gene therapy of cancer. *Cancer Gene Ther* 17, 420-428.
- 899 78. Aurecochea, C., Brestelli, J., Brunk, B.P., Dommer, J., Fischer, S., Gajria, B., Gao, X., Gingle,  
900 A., Grant, G., Harb, O.S., et al. (2009). PlasmoDB: a functional genomic database for malaria  
901 parasites. *Nucleic Acids Res* 37, D539-543.
- 902 79. Aurecochea, C., Barreto, A., Basenko, E.Y., Brestelli, J., Brunk, B.P., Cade, S., Crouch, K.,  
903 Doherty, R., Falke, D., Fischer, S., et al. (2017). EuPathDB: the eukaryotic pathogen genomics  
904 database resource. *Nucleic Acids Res* 45, D581-D591.
- 905 80. Stecher, G., Liu, L., Sanderford, M., Peterson, D., Tamura, K., and Kumar, S. (2014). MEGA-  
906 MD: molecular evolutionary genetics analysis software with mutational diagnosis of amino acid  
907 variation. *Bioinformatics* 30, 1305-1307.
- 908 81. Ren, J., Wen, L., Gao, X., Jin, C., Xue, Y., and Yao, X. (2008). CSS-Palm 2.0: an updated  
909 software for palmitoylation sites prediction. *Protein Eng Des Sel* 21, 639-644.
- 910 82. von Mering, C., Huynen, M., Jaeggi, D., Schmidt, S., Bork, P., and Snel, B. (2003). STRING: a  
911 database of predicted functional associations between proteins. *Nucleic Acids Res* 31, 258-261.

912

## 913 **Materials and Methods**

### 914 **Animal usage and ethics statement**

915 All animal experiments were performed by approved protocols (XMULAC20140004)  
916 by the Committee for Care and Use of Laboratory Animals of Xiamen University. The  
917 ICR mice (female, 5 to 6 weeks old) were purchased from the Animal Care Center of



918 Xiamen University and used for parasite propagation, drug selection, and parasite  
919 cloning.

920

### 921 **Plasmid construction and parasite transfection**

922 CRISPR/Cas9 plasmid pYcm was used for parasite genomic modification [70, 71]. To  
923 construct the plasmids for gene deletion, the N- or C-terminal segments (400–600 bp)  
924 of the coding regions were PCR-amplified as the left or right homologous arm or 400–  
925 600 bp from 5-UTR or 3-UTR following the translation stop codon as left or right arm,  
926 respectively. To construct the plasmids for gene tagging, the DNA fragment (encoding  
927 6HA, 4Myc, GFP, or mAID-2HA) was inserted between the left and right arms in frame  
928 with the gene of interest. For each gene tagging, two sgRNAs were designed to target  
929 sites close to the N- or C-terminal part of the coding region. To construct the plasmid  
930 for amino acid substitution, the donor template (700-800 bp) for homologous  
931 recombination was introduced with the targeted mutations for amino acid substitution  
932 and extra shield mutations via mutagenesis. These shield mutations in or adjacent to the  
933 protospacer-adjacent motif (PAM) were used to prevent the recognition and cleavage  
934 of the replaced locus by the gRNA/Cas9 complex. Seven sgRNAs were designed to  
935 target sites close to the desired mutation sites. The PCR primers and DNA  
936 oligonucleotides used are listed in the [Table S2](#). Blood with 15–25% parasitemia was  
937 collected from infected mice and cultured in RPMI-1640 (Gibco, cat#11879020)  
938 supplied with 20% FBS (Gibco, cat#10099) at 37°C for 3 h for schizont development.  
939 After washing two times with RPMI-1640, the parasite were electroporated with 5-10  
940 µg purified circular plasmid DNA using Lonza Nucleotector. Transfected parasites were  
941 immediately intravenously injected into a naïve mouse and applied to pyrimethamine  
942 pressure (provided in drinking water at concentration 7 mg/ml) from 24 h post  
943 transfection. Parasites with transfected plasmids usually appear about 5 to 7 days after  
944 drug selection. Genomic DNA of parasites were extracted for genotyping PCR analysis.  
945 Parasite clones with correct modification were obtained using the limiting dilution  
946 method.

947



## 948 **Genotypic analysis of transgenic parasites**

949 All transgenic parasites were generated from the *P. yoelii* 17XNL or *Tir1* strains.  
950 Infected blood samples from transfected mice were collected from the tail of mice and  
951 lysed by 1% saponin in PBS. Parasite genomic DNAs were extracted using DNeasy  
952 Blood Kits (Qiagen). For each genetic modification, both 5' and 3' homologous  
953 recombination were detected by PCR to confirm successful integration of homologous  
954 arms. The PCR primers used for genotyping are listed in the [Table S2](#). Positive clones  
955 with correct modifications were obtained after limiting dilution. The PCR-genotyping  
956 results confirming the genetic modified parasites were shown in the [Fig S9](#).

957

## 958 **Parasite negative selection with 5-Fluorouracil**

959 Modified parasites subjected for sequential modification were negatively selected to  
960 remove pYcM plasmid. 5-fluorouracil (5-FC, Sigma-Aldrich, cat#F6627) was  
961 prepared in drinking water at a final concentration of 2.0 mg/ml. A naïve mouse  
962 receiving parasites with residual plasmid was subjected to 5-FC selection for 6-8 days.  
963 Diagnostic PCR was performed to confirm the complete removal of plasmid in the  
964 parasites. The PCR primers used are listed in the [Table S2](#).

965

## 966 **DNA mutagenesis for amino acid replacement**

967 For the amino acid replacement in the proteins of interest, the wildtype gene cDNAs  
968 were cloned into NheI and NcoI sites in the pL0019-HA/Myc vector (*isp3* gene  
969 promoter for parasite asexual blood stages) or pcDNA3.1-HA/Myc vector (CMV  
970 promoter for mammalian cell). A PCR-based protocol with mutagenic oligonucleotides  
971 was used to generate the gene mutants. The primers used are listed in the [Table S2](#).

972

## 973 **Protein transient expression in asexual blood stage parasites**

974 For protein transient expression, the coding sequence of target genes was tagged N-or  
975 C-terminally with an epitope tag and driven by the regulatory regions of the *isp3* gene  
976 (1.5 kb of the 5'-UTR and 1 kb of the 3'-UTR). Gene expression cassettes were inserted  
977 into the pL0019-derived vector containing a human *dhfr* marker for pyrimethamine

978 selection. Blood stage parasites were electroporated with 10 µg vector plasmid DNA  
979 and selected with pyrimethamine (70 µg/ml) for 7 days. Parasites appearing after  
980 pyrimethamine selection were used for further experiments.

981

## 982 **Antibodies and antiserum**

983 The primary antibodies used included: rabbit anti-HA (Western blot, 1:1000, IFA,  
984 1:1000, 3724S, Cell Signaling Technology (CST)), mouse anti-HA (IFA, 1:500, sc-  
985 57592, Santa Cruz Biotechnology), rabbit anti-Myc (Western blot, 1:1000, 2276S,  
986 CST), mouse anti-Myc (IFA, 1:500, sc-40, Santa Cruz Biotechnology) and rabbit anti-  
987 Histone H3 (western blot, 1:2000, 9715, CST). The secondary antibodies used included:  
988 goat anti-rabbit IgG HRP-conjugated and goat anti-mouse IgG HRP-conjugated  
989 secondary antibody (1:5000, Abcam), Alexa Fluor 555 goat anti-rabbit IgG (1:1000,  
990 Thermo Fisher Scientific), Alexa Fluor 488 goat anti-rabbit IgG (1:1000, Thermo  
991 Fisher Scientific), Alexa Fluor 555 goat anti-mouse IgG (1:1000, Thermo Fisher  
992 Scientific), Alexa Fluor 488 goat anti-mouse IgG (1:1000, Thermo Fisher Scientific),  
993 and Alexa Fluor 488 conjugated streptavidin (1:1000, Invitrogen, S32354). Antiserums,  
994 including rabbit anti-GAP45 (Western blot, 1:1000, IFA, 1:1000), mouse anti-GAP45  
995 (IFA, 1:1000), and rabbit anti-BiP (Western blot, 1:1000) were described in previous  
996 studies [17]. Other antiserums, including rabbit anti-CDPK1 (Western blot, 1:1000, IFA,  
997 1:500), rabbit anti-Erd2 (Western blot, 1:1000), and rabbit anti-MSP1 (Western blot,  
998 1:2000, IFA, 1:1000) were prepared by immunization of rabbit or mouse with  
999 recombinant protein as antigens: for CDPK1 (D<sub>11</sub>VRG<sub>NK</sub>...CDNKPF<sub>523</sub>), for Erd2  
1000 (E<sub>38</sub>LYLIV...PFNGEV<sub>221</sub>), and for MSP1 (V<sub>1413</sub>YTKRL...GVFCSS<sub>1752</sub>).

1001

## 1002 **Immunofluorescence assays**

1003 Cells were fixed with 4% paraformaldehyde for 15 min and rinsed with PBS three  
1004 times. The cells were then permeabilized with 0.1% Triton X-100 for 10 min, rinsed  
1005 with PBS twice, and incubated with 5% BSA for 1 h. They were incubated with the  
1006 primary antibodies overnight at 4°C, rinsed with PBS three times, and incubated with  
1007 fluorescent conjugated secondary antibodies for 1 h in the dark. After washing with

1008 PBS, the cells were stained with DNA dye Hoechst 33342 for 10 min and mounted  
1009 on glass slides using the mounting medium. Images were captured using identical  
1010 settings under Zeiss LSM 880 confocal microscope.

1011

### 1012 **Live cell imaging**

1013 Parasites expressing GFP-fused proteins were collected in 200  $\mu$ L PBS, washed twice  
1014 with PBS and stained with Hoechst 33342 at room temperature for 10 min. After  
1015 centrifugation at 300 g for 5 min, the parasites pellets were re-suspended in 100  $\mu$ L of  
1016 3% low melting agarose, spread evenly on the bottom of 35 mm plate, and followed by  
1017 cooling at RT for 15 min. The parasites were imaged by a Zeiss 880 confocal  
1018 microscope with the 63 $\times$ /1.40 oil objective.

1019

### 1020 **Airyscan super-resolution microscopy**

1021 Parasites were imaged using a 100 $\times$ /1.46 NA oil immersion objective on a Zeiss  
1022 LSM880 fitted with an Airyscan detector. Super-resolution reconstructions of multi-  
1023 labelled *dhhc2::6HA* schizonts were acquired, sequentially in three channels, as follows:  
1024 channel 1= 561 nm laser (HA), channel 2 = 488 nm laser (GAP45), channel 3 = 405  
1025 nm laser (Hoechst 33342). Images were acquired using a defined region of interest (ROI)  
1026 with an average of two, with 2,048  $\times$  2,048 pixels of image size and 8-bit image depth.  
1027 Every part of each image remains fully within the dynamic range of pixel intensity.  
1028 Three-dimensional (3D) Z-stacks were acquired at 0.25  $\mu$ m intervals in Z axis using  
1029 piezo drive prior to being Airyscan processed in 3D using batch mode in ZEN Black  
1030 (Zeiss). Maximum intensity projections of super-resolution images were output with  
1031 the default setting.

1032

### 1033 **Protein extraction and immunoblot**

1034 Parasite total proteins from asexual blood stages were extracted with RIPA Lysis Buffer  
1035 (50 mM pH 7.4 Tris, 150 mM NaCl, 1% Triton X-100, 1% sodium deoxycholate, 0.1%  
1036 SDS, 1 mM EDTA) containing protease inhibitor cocktail and PMSF. After ultra-  
1037 sonication, the lysates were incubated on ice for 30 min before centrifugation at 12,000

1038 g for 10 min at 4°C. The supernatant was then lysed in Laemmli sample buffer, stored  
1039 at 4°C for immunoblot. Protein samples were separated in SDS-PAGE, transferred to  
1040 PVDF membrane that was blocked by 5% skim milk in TBST, and then incubated with  
1041 primary antibodies. After incubation, the membrane was washed three times with TBST  
1042 and incubated with HRP-conjugated secondary antibodies. The membrane was washed  
1043 four times in TBST before the enhanced chemiluminescence detection.

1044

#### 1045 **Dot blot detecting biotinylated proteins**

1046 Dot blot assay of the biotinylated proteins was performed as described previously [72].  
1047 Freshly extracted proteins were quantified using the Pierce BCA Protein Assay kit  
1048 (Thermo Scientific, cat#23227). PVDF membrane pre-activated by methanol was  
1049 prepared. Equal amounts of total proteins (~2 µg) from each sample were loaded onto  
1050 the PVDF membrane surface. After protein absorbing and air-dry, the PVDF membrane  
1051 was blocked by 5% skim milk in TBST and incubated with HRP-conjugated  
1052 streptavidin (GenScript, M00091) for the enhanced chemiluminescence detection.  
1053 MSP1 protein was used as the loading control.

1054

#### 1055 **Protein solubility assay**

1056 Purified schizonts ( $1 \times 10^6$ ) from each sample were used for protein solubility assay.  
1057 Parasites were lysed in 100 µl of hypotonic buffer (10 mM Hepes, 10 mM KCl, pH 7.4)  
1058 and frozen and thawed (-80°C to 37°C) twice for cell lysis. The lysates were centrifuged  
1059 at 12,000 g for 5 min at 4°C, and the supernatants containing cytosolic soluble proteins  
1060 were collected as “Hypo” fraction. The pellet was then rinsed with 1 ml of ice-cold PBS,  
1061 re-suspended in 100 µl of freshly prepared carbonate buffer (0.1 M Na<sub>2</sub>CO<sub>3</sub>), kept on  
1062 ice for 30 min, and then centrifuged at 12,000 g for 5 min at 4°C. The supernatants  
1063 containing peripheral membrane proteins were collected as “Carb” fraction. The pellet  
1064 was rinsed with 1 ml of ice-cold PBS, re-suspended in 100 µl of freshly prepared Triton  
1065 X-100 buffer (1% Triton X-100), kept on ice for another 30 min, and centrifuged at  
1066 12,000 g for 5 min at 4°C. The supernatants containing integral membrane proteins  
1067 were collected as “Trx” fraction. The final pellet including insoluble proteins and non-

1068 protein materials was solubilized in 1× Laemmli sample buffer as “pellet” fraction. All  
1069 fractions were boiled at 95°C for 10 min and centrifuged at 12,000 g for 5 min. Equal  
1070 volume of supernatants from each sample was used for immunoblot. For detecting the  
1071 change in IMC localization of palmitoylated proteins, Hypo fractions were referred to  
1072 “light fraction”, while Hypo-insoluble fractions were referred to “heavy fraction”. All  
1073 buffers used in this assay contain the protease inhibitor cocktail (MedChemExpress,  
1074 cat#HY-K0010).

1075

### 1076 **Purification of schizont and ring/trophozoite stage parasites**

1077 The asexual blood stage parasites with 15-25% parasitemia were cultured in RPMI-  
1078 1640 medium supplied with 20% fetal bovine serum (FBS) and 100 IU penicillin,  
1079 100 mg/ml streptomycin at 37°C for 3 h for increasing schizont production. The  
1080 schizonts were purified using the Nycodenz density gradient centrifugation. Briefly, the  
1081 schizonts were suspended in RPMI-1640 and 7 ml of the schizont culture was loaded  
1082 on the top of a 2 ml of the 60% Nycodenz solution in a 15 ml centrifugation tube. After  
1083 centrifugation at 300g for 30 min and removing the supernatants, top layer containing  
1084 the schizonts were collected. Rings and early trophozoites were collected at the bottom  
1085 with uninfected erythrocytes.

1086

### 1087 **TurboID-based proximity-labelling and Pull-down**

1088 The schizonts expressing the biotin ligase TurboID or BioID were purified using the  
1089 methods described above. After incubating with 100 µM biotin (Sigma-Aldrich,  
1090 cat#B4639) at 37°C for 3 h, the schizonts were lysed with 0.01% saponin and stored at  
1091 -80°C. For pull-down, parasites were lysed in RIPA buffer (50 mM Tris-HCl pH 7.4,  
1092 150 mM NaCl, 1% NP40, 0.1% SDS, 1% Sodium deoxycholate, 1% TritonX-100, 1  
1093 mM EDTA) containing protease inhibitor cocktail and PMSF. 10 mg of cell lysates  
1094 were collected as a biological replicate and incubated with 100 µL of streptavidin  
1095 sepharose (Thermal Scientific, cat#SA10004). After incubation overnight at 4°C,  
1096 streptavidin beads were then washed with the following procedures: twice with RIPA  
1097 lysis buffer, once with 2 M urea in 10 mM Tris-HCl, pH 8.0, and two more times with

1098 50 mM Tris-HCl (pH 8.5). The washed beads were re-suspended in 200  $\mu$ L 50 mM  
1099 Tris-HCl (pH 8.5). The biotinylated proteins were digested on-bead by rolling with 1  
1100  $\mu$ g of trypsin for 16 h at 37°C followed by a second digest with 0.5  $\mu$ g trypsin for 2  
1101 hours.

1102

### 1103 **Protein digestion and peptide desalting**

1104 The enriched biotinylated proteins were digested on-bead by rolling with 1  $\mu$ g of trypsin  
1105 for 16 h at 37°C followed by a second digest with 0.5  $\mu$ g trypsin for 2 hours. For  
1106 digested peptide samples, StageTips packed with SDB-RPS (2241, 3 M) material (made  
1107 in-house) was used for desalting. Briefly, about 1% trifluoroacetic acid (TFA; Sigma-  
1108 Aldrich, cat#T6508) was added into the reactions to stop digestion. The SDB-RPS  
1109 StageTips were conditioned with 100  $\mu$ l 100% acetonitrile (ACN) (Sigma-Aldrich,  
1110 cat#3485). The peptides were loaded into StageTips, followed by centrifugation at 4000  
1111 g for 5 min. StageTips were washed twice with 100  $\mu$ l 1% TFA/ isopropyl alcohol  
1112 (Sigma-Aldrich, cat#I9030), and then washed with 100  $\mu$ l 0.2% TFA. Elution of  
1113 peptides was performed using 80% ACN/5% ammonia water. All eluted materials were  
1114 collected in glass vials (A3511040; CNW Technologies) and dried at 45°C using a  
1115 SpeedVac centrifuge (Eppendorf Concentrator Plus; 5305).

1116

### 1117 **Mass spectrometry**

1118 Digested peptides were dissolved in 0.1% formic acid (Sigma-Aldrich, cat#06440)  
1119 containing independent retention time (iRT) peptides and analyzed by Sequential  
1120 Window Acquisition of All Theoretical Mass Spectra (SWATH-MS) on TripleTOF  
1121 5600. For SWATH-MS, an MS1 scan records a 350 to 1250 m/z range for 250 ms, and  
1122 a 100 to 1800 m/z range was recorded for 33.3 ms in the high-sensitivity mode MS2  
1123 scan. One MS1 scan was followed by 100 MS2 scans, which covered a precursor m/z  
1124 range from 400 to 1200. SWATH-MS wiff files were converted to centroid mzXML  
1125 files using MSConvert (version 3.0.19311), which were then subjected to DIA-Umpire  
1126 software (version 2.1.6) for analysis. Signal-extraction module of DIA-Umpire was  
1127 used to generate pseudo-DDA mgf files. These mgf files were converted to mzML files,



1128 which are subjected to database search using MSFragger (version 2.3) through the  
1129 FragPipe interface (<https://fragpipe.nesvilab.org/>). The search parameters were set as  
1130 followed: precursor monoisotopic mass tolerance '50 ppm' fragment mass tolerance  
1131 '0.1 Da', modification '57.021464@C', potential modification mass '15.994915@M',  
1132 cleavage 'semi' and maximum missed cleavage sites '1'. PeptideProphet,  
1133 ProteinProphet and FDR filtering were performed by Philosopher software (version  
1134 3.2.2) (<https://github.com/Nesvilab/philosopher>) through the FragPipe interface  
1135 (<https://fragpipe.nesvilab.org/>) [73]. The pep.xml search results were validated and  
1136 scored using PeptideProphet followed by analysis with ProteinProphet. The precursor  
1137 ions and proteins were filtered at 1% FDR. The spectral library was generated by using  
1138 EasyPQP tool (version 0.1.12) which is integrated in the FragPipe software. SWATH-  
1139 MS files were converted to profile mzXML files. The spectral library based targeted  
1140 analysis of SWATH-MS was performed using the QuantPipe tool based on the  
1141 OpenSWATH-PyProphet-Tric workflow [74, 75]. The results were filtered at 1% global  
1142 protein FDR. Statistical analysis by Perseus software (version 1.6.10.43) were  
1143 performed as previously reported [76]. Parasite protein intensities were imported into  
1144 Perseus. Protein abundances were normalized with total intensities of all proteins per  
1145 run and then log<sub>2</sub> transformed. The Pearson correlation analysis, hierarchical clustering,  
1146 and volcano plots were performed with default settings.

1147

#### 1148 **Chemical treatment of parasite**

1149 To evaluate the effects of 2-BP on parasite protein palmitoylation and localization, 2-  
1150 BP (Sigma-Aldrich, cat#21604) was added to parasite culture at a final concentration  
1151 of 100  $\mu$ M at 37°C for the time indicated in each experiment. To deplete the target  
1152 parasite proteins *in vitro* by auxin-induced protein degradation, the parasite culture was  
1153 added with a final concentration of 1mM IAA (Sigma-Aldrich, cat#I2886) or vehicle  
1154 (DMSO 1:1000) at 37°C for 3-12 h with ambient ~5% CO<sub>2</sub> levels. To deplete the target  
1155 parasite proteins in mice, mice were administered with either IAA or vehicle  
1156 intraperitoneally. Each mouse was injected with 0.2 mL of PBS containing IAA (20

1157 mg/mL IAA, 3 mM NaOH, pH 7.4) or vehicle (similar solution without IAA). The  
1158 usage of this dosage of IAA in mice was referred to a previous study [77].

1159

### 1160 **Quantitative real-time PCR**

1161 Purified parasites were prepared for extraction of total RNAs. Following isolation with  
1162 TRIzol (Invitrogen), total RNA was purified with the RNAeasy Mini Kit (QIAGEN,  
1163 cat#74106). cDNA was then obtained with the TransScript® Two-Step RT-PCR  
1164 SuperMix (TransGen Biotech, cat#AT401-01) and checked afterwards for gDNA  
1165 contaminations via RT-PCR. The Real-time quantitative PCR was performed using  
1166 SYBR Green Supermix (Bio-Rad, cat#1708882) in the Bio-Rad iCycler iQ system  
1167 (Bio-Rad, USA). The primers used are listed in the [Table S2](#). All runs under the  
1168 following conditions: 95°C for 20 s followed by 40 cycles of 95°C for 3 s; 60°C for 30  
1169 s. The samples were run in triplicate and normalized to *gapdh* using a  $\Delta\Delta$  cycle  
1170 threshold-based algorithm, to provide arbitrary units representing relative expression  
1171 levels. Graphpad 8 was used for statistical analysis.

1172

### 1173 **Flow cytometry analysis**

1174 Parasite-infected erythrocytes were collected from mice via tail vein or *in vitro*  
1175 culture, washed twice with PBS, and suspended in PBS with Hoechst 33342 (Thermo  
1176 Fisher Scientific, cat#62249) for nuclei staining. The parasites were analyzed by flow  
1177 cytometry in a BD LSR Fortessa flow cytometer. Parasite-infected erythrocytes were  
1178 gated using the fluorescence signal of 405 nm (Hoechst 33342), while uninfected  
1179 erythrocytes were used as a control. All data were processed by FlowJo software.

1180

### 1181 ***In vitro* trophozoite to schizont development**

1182 Purified rings and early trophozoites via Nycodenz centrifugation were incubated with  
1183 vehicle or IAA and cultured for 12 h at 37°C at ambient CO<sub>2</sub> (~5%). Mature schizonts  
1184 developed from the early trophozoites were counted by thin blood smears with Giemsa  
1185 staining.

1186

### 1187 **Erythrocyte invasion of merozoite**

1188 Different from an automotous rupture of mature schizonts of the *in vitro* cultured *P.*  
1189 *falciparum*, the *P. yoelii* schizonts displayed an arrest in rupture after maturation in the  
1190 *in vitro* condition.  $1.0 \times 10^8$  purified schizonts were incubated with vehicle and IAA  
1191 respectively at 37°C for 3 h to deplete the DHHC2 protein. After this, the schizonts  
1192 were mechanically disrupted by vibrating for 1 h. Under these conditions, merozoite  
1193 release occurs in about 50% of mature schizonts with both vehicle and IAA treatment.  
1194 Similar number of merozoites were injected intravenously into each mouse with 3-4  
1195 naïve mice in each group. Mouse blood was collected for blood smears at 20 min  
1196 after injection and the parasitemia of ring-stage was quantified by Giemsa solution  
1197 staining and flow cytometry.

1198

### 1199 **Mammalian cell culture and transient transfection**

1200 HEK293T cells were maintained in Dulbecco's modified Eagle's medium (DMEM)  
1201 supplemented with 10% fetal bovine serum (FBS), 100 IU penicillin, 100 mg/ml  
1202 streptomycin at 37°C in a humidified incubator containing 5% CO<sub>2</sub>. TurboFect  
1203 transfection reagent (Thermo Fisher Scientific, cat#R0532) was used for cell  
1204 transfection. Total DNA for each plate was adjusted to the same amount by using a  
1205 relevant empty vector. Transfected cells were harvested at 48 h after transfection for  
1206 further analysis.

1207

### 1208 **Detection of protein palmitoylation**

1209 Protein palmitoylation was detected using the Acyl-RAC assay described previously  
1210 [17]. Schizonts were lysed in DHHC Buffer B (2.5% SDS, 1 mM EDTA, 100 mM  
1211 HEPES, pH 7.5) containing protease inhibitor cocktail and PMSF and incubated on ice  
1212 for 30 min. After centrifugation at 12,000 g for 10 min, supernatant was collected and  
1213 treated with 0.1% methyl methanethiosulfonate (MMTS) at 42°C for 15 min. MMTS  
1214 was removed by acetone precipitation followed by washing with 70% acetone three  
1215 times. Protein samples were solubilized in DHHC Buffer C (1% SDS, 1 mM EDTA,  
1216 100 mM HEPES, pH 7.5) and were captured on thiopropyl sepharose 6B (GE

1217 Healthcare, 17-0402-01) in the presence of 2 M hydroxylamine or 2 M NaCl (negative  
1218 control) by agitating for 3 h at room temperature. Loading controls (Input) were  
1219 collected before addition of thiopropyl sepharose 6B beads. After five times washing  
1220 with urea DHHC Buffer (1% SDS, 1 mM EDTA, 100 mM HEPES, 8 M urea, pH 7.5),  
1221 the captured proteins were eluted from thiopropyl sepharose 6B beads in 60  $\mu$ l DHHC  
1222 Buffer C supplemented with 50 mM DTT, and mixed with Laemmli sample buffer for  
1223 further western blot analysis.

1224

### 1225 **Transmission electron microscopy**

1226 For transmission electron microscope (TEM), purified parasites were pre-fixed with  
1227 2.5% glutaraldehyde in 0.1 M phosphate buffer at 4°C overnight, rinsed three times  
1228 with PBS, then fixed with 1% osmium acid for 2 h, and rinsed three times with PBS.  
1229 Fixed samples were dehydrated with concentration gradient acetone. After embedding  
1230 and slicing, thin sections were stained with uranyl acetate and lead citrate. All samples  
1231 were imaged using the HT-7800 electron microscope.

1232

### 1233 **Bioinformatic analysis and tools**

1234 The genomic DNA sequences of target genes were downloaded from PlasmoDB  
1235 database [78]. The sgRNAs of a target gene were designed using EuPaGDT [79].  
1236 Amino acid sequence alignment was analyzed using MEGA5.0 [80]. The  
1237 palmitoylation sites in protein were predicted using CSS-Palm 4.0 [81]. The  
1238 relationship of protein-protein interaction was analyzed with STRING ([https://string-](https://string-db.org)  
1239 [db.org](https://string-db.org))[82]. Gene ontology analysis were performed on the PlasmoDB database [78].

1240

### 1241 **Quantification and statistical analysis**

1242 For quantification of protein expression in western blot, protein band intensity was  
1243 quantified using Fiji software from three independent experiments. The signals of target  
1244 proteins were normalized with that of control proteins. For quantification of protein  
1245 expression in IFA, confocal fluorescence microscopy images were acquired under  
1246 identical parameters. Fluorescent signals were quantified using Fiji software. More than

1247 30 cells were analysed in each group. Protein relative expression was calculated as the  
1248 signal intensity compared to that of control group. Statistical analysis was performed  
1249 using GraphPad Software 5.0 .Two-tailed Student's t-test or Whiney Mann test was used  
1250 to compare differences between treated groups and their paired controls. n represents  
1251 the number of parasite cells tested in each group, or experimental replication. The exact  
1252 value of n was indicated within the figures. P value in each statistical analysis was also  
1253 indicated within the figures.

1254

#### 1255 **Data availability**

1256 Mass spectrometry proteomics data have been deposited to the ProteomeXchange  
1257 Consortium and can be accessed via the PRIDE partner repository. The website for MS  
1258 data is <https://www.iprox.cn/page/PSV023.html?url=1630462125518RngX>. All other  
1259 relevant data in this study are available from the authors upon request.





## **Figure 1. Proteomic of *P. yoelii* schizont IMC by TurboID and quantitative mass spectrometry**

**A.** Schematic of schizonts with TurboID ligase localizing in cytoplasm (Tb-cyto) and IMC (Tb-IMC). EV indicates the schizonts expressing empty vector (EV). See the detailed information of Tb-IMC and Tb-cyto in the **Supplementary figure 2**.

**B.** Immunoblot and streptavidin blot of total lysate from the schizonts expressing the EV, Tb-cyto and Tb-IMC. Tagged ligase was detected by anti-HA antibody while biotinylated proteins were detected by streptavidin-conjugated horseradish peroxidase (streptavidin-HRP). Comparable loaded lysate was indicated by BiP control and Coomassie blue stain.

**C.** Co-staining of TurboID ligase and biotinylated proteins in the schizonts expressing the ligase of the EV, Tb-cyto, and Tb-IMC. The schizonts incubated with or without 100  $\mu$ M biotin were co-stained with the SA-488 and anti-HA antibody. x/y in the figure is the number of cell displaying signal/the number of cells analyzed. Scale bar=5  $\mu$ m.

**D.** Workflow for filtering the Tb-IMC interacting proteins (proximal interactors). 488 biotinylated proteins that were at least two times more abundant in Tb-IMC than that in Tb-cyto control at both three replicates and with an adjusted P value < 0.05, were significantly enriched. Detailed information in the **Supplementary figure 2**.

**E.** Interaction network of 300 Tb-IMC interacting proteins (STRING, p-value < 1.0e-16, bold lines). Two subgroups (I: left, II: right) were functionally clustered. Many known IMC or IMC-associated proteins were clustered into the subgroup I while many annotated ER/Golgi secretory or vesicle trafficking proteins were clustered into the subgroup II.

**F.** Volcano plots showing the 300 Tb-IMC interacting proteins. Relative biotinylation of each protein was calculated by quantifying protein intensity in Tb-IMC relative to Tb-cyto schizonts (n=3). Proteins in the subgroup I (red circle) and subgroup II (yellow circle) are indicated.

Figure 2

A

22 genes selected for validation in *P. yoelii*

○ 8 reported IMC proteins in *P. berghei* or *P. falciparum*

○ 14 new Tb-IMC interacting proteins

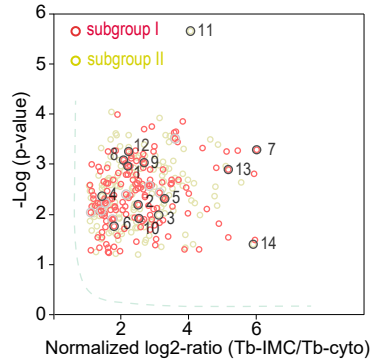

B

| gene ID           | (annotation)                       | subgroup | IMC localization |
|-------------------|------------------------------------|----------|------------------|
| 1. PY17X_0207400  | (ATP synthase-associated protein)  | ○        | no               |
| 2. PY17X_0312400  | (RING zinc finger protein)         | ○        | yes              |
| 3. PY17X_0417300  | (YOP1)                             | ○        | no               |
| 4. PY17X_0418000  | (VPS46)                            | ○        | yes              |
| 5. PY17X_0812700  | (PMP1)                             | ○        | yes              |
| 6. PY17X_0917100  | (aquaglyceroporin)                 | ○        | no               |
| 7. PY17X_1131200  | (tetratricopeptide repeat protein) | ○        | yes              |
| 8. PY17X_1139700  | (Unknown function)                 | ○        | yes              |
| 9. PY17X_1220300  | (pPK 1)                            | ○        | yes              |
| 10. PY17X_1348200 | (Unknown function)                 | ○        | yes              |
| 11. PY17X_1359500 | (Rab11b)                           | ○        | yes              |
| 12. PY17X_1411000 | (RNA-binding protein)              | ○        | yes              |
| 13. PY17X_1441500 | (Unknown function)                 | ○        | yes              |
| 14. PY17X_1453100 | (v-SNARE protein)                  | ○        | yes              |

C

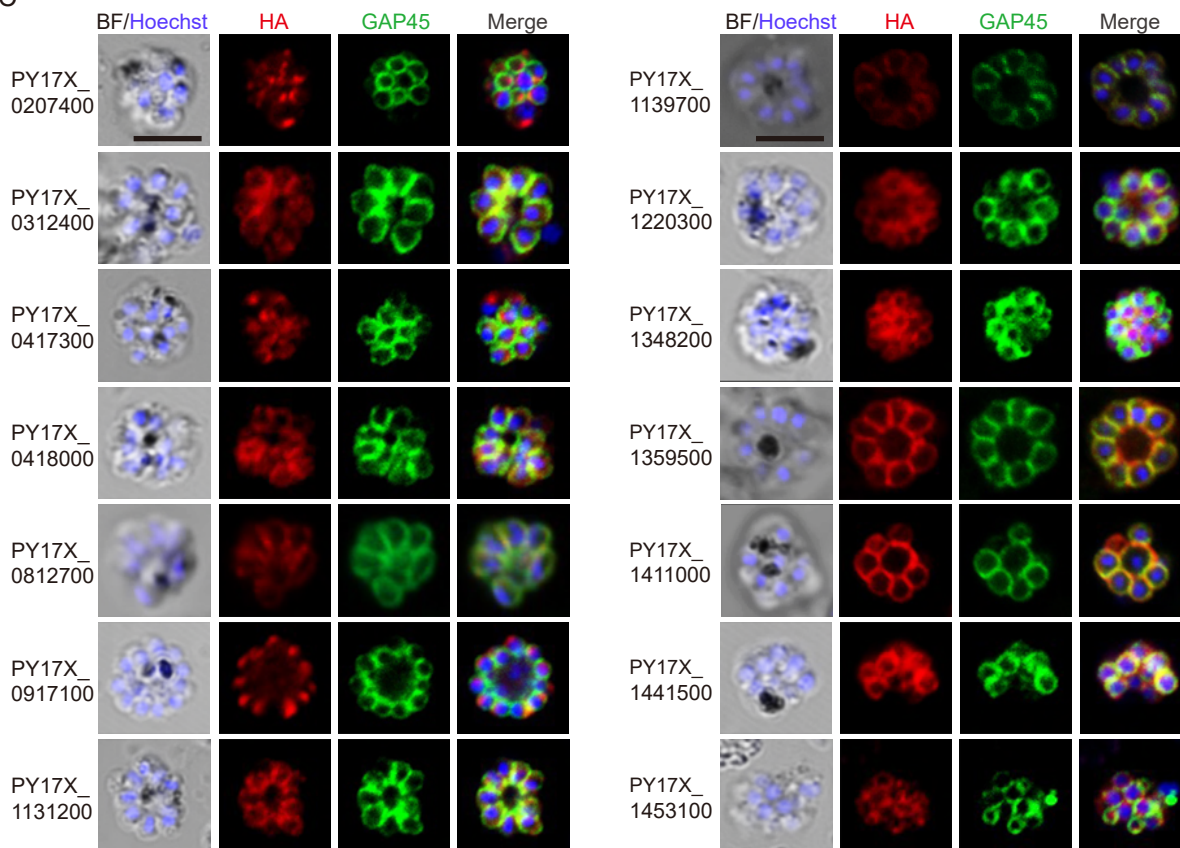

**Figure 2. Validation of 11 new IMC proteins by localization analysis**

**A.** 22 candidates selected from the Tb-IMC interacting proteins for subcellular localization analysis in the *P. yoelii*. The orthologues of 8 proteins (light gray dot) have been experimentally validated to be IMC-residing or -associated in the schizonts of *P. berghei* or *P. falciparum*, while subcellular localization of other 14 proteins (dark gray dot) have not been well-characterized in *Plasmodium* species.

**B.** Information and subcellular localization summary of the 14 newly tested Tb-IMC interacting proteins shown in **A**.

**C.** IFA analysis of 14 Tb-IMC interacting proteins in the *P. yoelii* schizonts. Each protein was tagged with a 6HA at the N- or C-terminus and episomally expressed in the schizonts. The schizonts were co-stained with antibodies against GAP45 and HA. Nuclei were stained with Hoechst 33342. Scale bar=5  $\mu$ m.

Figure 3

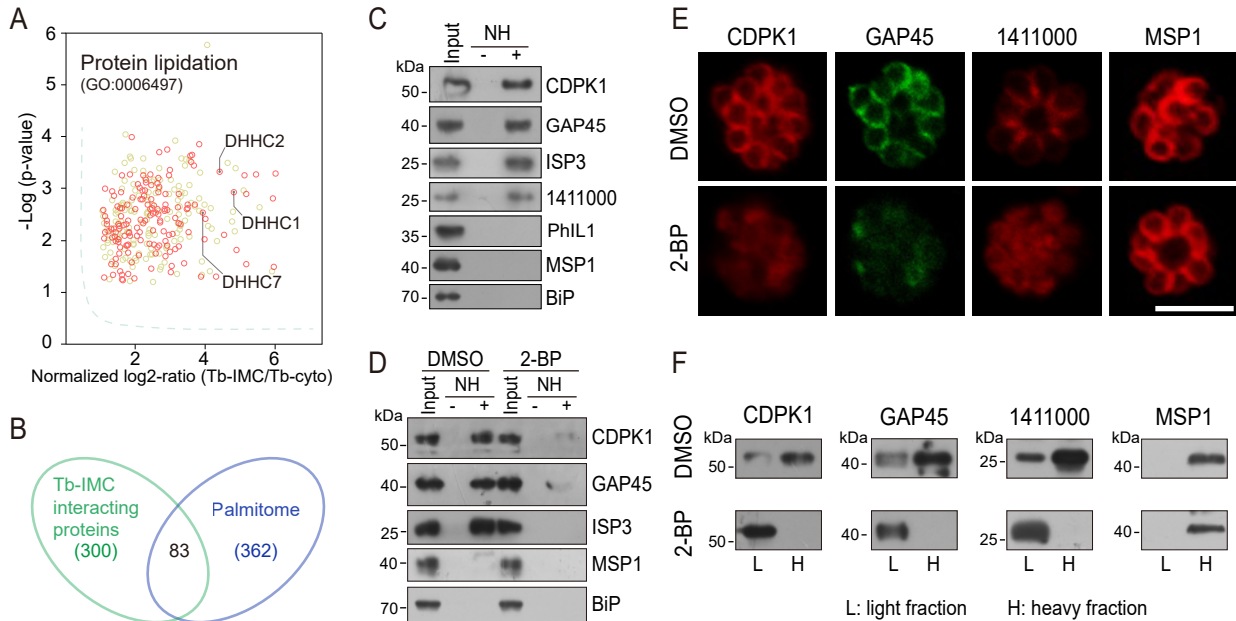

### **Figure 3. Palmitoylation of certain IMC proteins and palmitoylation regulates protein localization**

**A.** Enrichment of enzymes for protein lipidation in the Tb-IMC interacting proteins shown in the **Figure 1F**, including three palmitoyl-S-acyl-transferases DHHC2, DHHC1, and DHHC7.

**B.** Venn diagram showing overlap between Tb-IMC interactors (green) identified in this study and the orthologs within the *P. falciparum* palmitome (blue). 83 Tb-IMC interactors (overlap, 28%) were considered to be potentially palmitoylated. Numbers indicate the number of proteins identified.

**C.** Acyl-RAC method detecting palmitoylation of CDPK1, GAP45, ISP3, and PY17X\_1411000, but not PhIL1 in schizonts. NH: NH<sub>2</sub>OH. MSP1 and BiP served as loading controls. Total proteins were treated with MMTs to block the thiol side chain in free cysteine. Proteins with palmitoylated cysteine were re-exposed the thiol side chain with removal of palmitic acid by NH<sub>2</sub>OH, purified via Thiopropyl Sepharose, and eluted by DTT for immunoblot. Two replicates performed.

**D.** Palmitoylation analysis of CDPK1, GAP45, and ISP3 in schizonts treated with 2-BP. NH: NH<sub>2</sub>OH. MSP1 and BiP served as loading controls. Two replicates performed.

**E.** IFA analysis of CDPK1, GAP45, PY17X\_1411000, and MSP1 in schizonts treated with 2-BP and DMSO respectively. Scale bar= 5  $\mu$ m.

**F.** Fractionation analysis of CDPK1, GAP45, PY17X\_1411000, and MSP1 in schizonts treated with 2-BP and DMSO respectively. Light fraction includes cytosolic proteins while heavy fraction includes membrane proteins and cytoskeleton proteins. Two replicates performed.

Figure 4

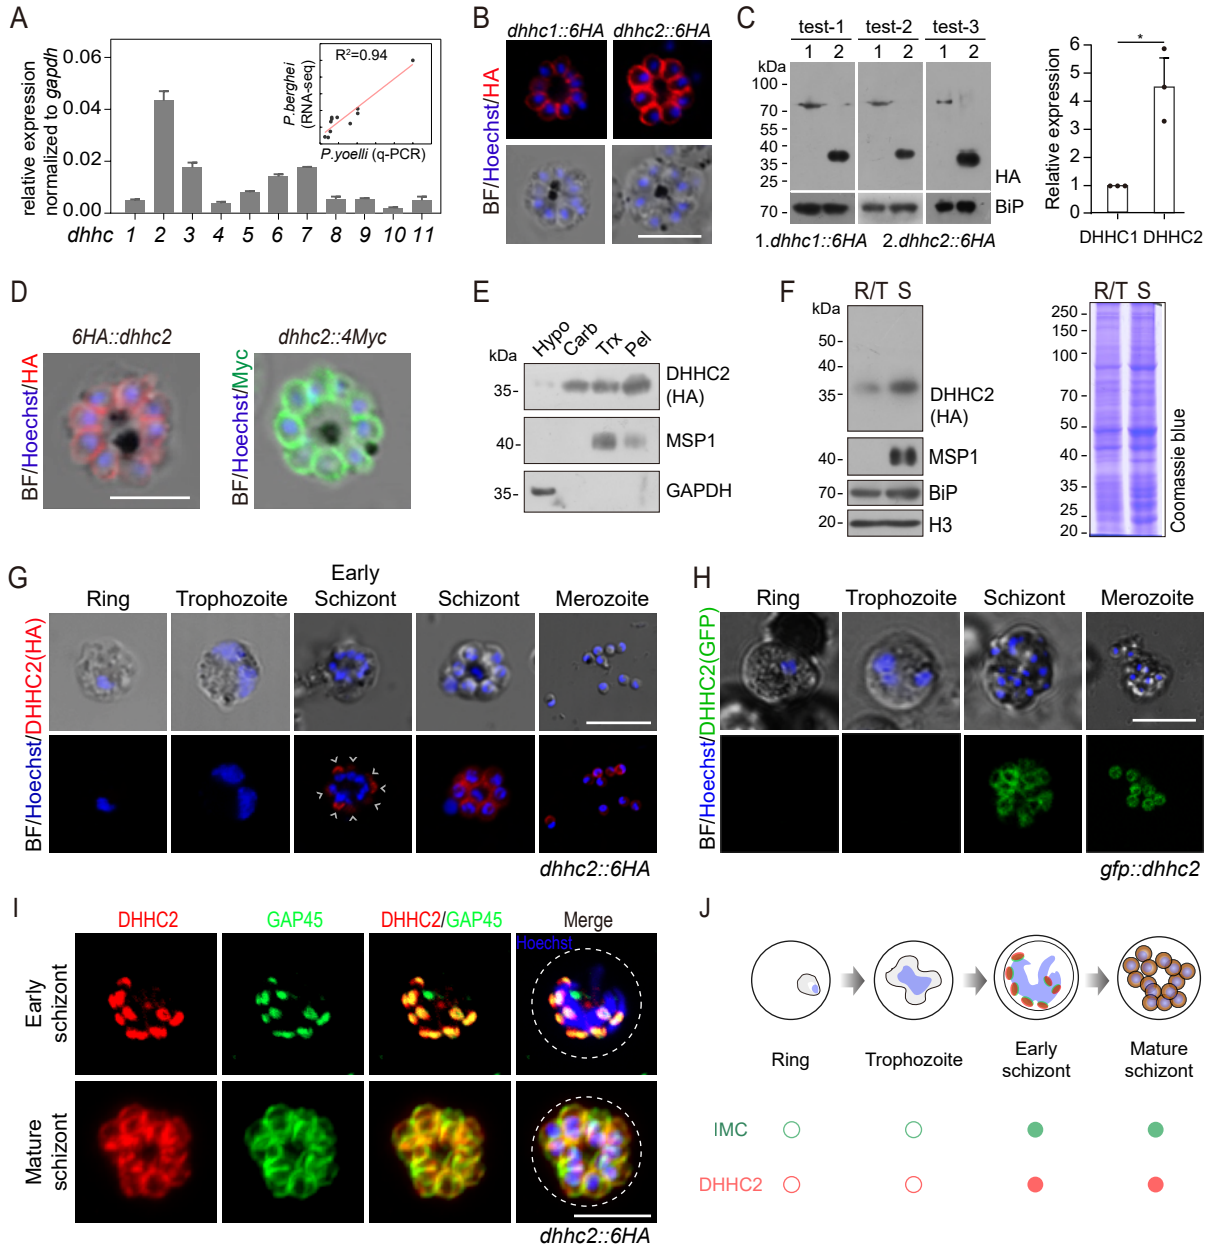

**Figure 4. DHHC2 is an IMC-residing palmitoyl-S-acyl-transferase in schizonts**

**A.** RT-qPCR of transcripts for 11 *dhhc* (*dhhc1- dhhc11*) in schizonts. Gene expression was normalized to the *gapdh* transcript. The inset indicates positive correlation between mRNA levels of these *P. yoelii dhhc* genes and mRNA levels of their *dhhc* orthologs in *P. berghei* determined via RNA-seq. Values are means  $\pm$  SD (n=3).

**B.** IFA analysis of DHHC1 and DHHC2 in schizonts from two tagged parasite strains *dhhc1::6HA* and *dhhc2::6HA*. Scale bar = 5  $\mu$ m.

**C.** Immunoblot of DHHC1 and DHHC2 from the cell lysate of similar number of schizonts from the *dhhc1::6HA* and *dhhc2::6HA* parasite respectively. Right panel: the quantification of band intensity. Values are means  $\pm$  SEM (n = 3 biological replicates), two-tailed t-test, \*P < 0.05.

**D.** IFA analysis of DHHC2 in schizonts of another two tagged parasite strains *6HA::dhhc2* and *dhhc2::4Myc*. Scale bar = 5  $\mu$ m.

**E.** Solubility assay detected membrane association of DHHC2 in schizonts using different detergents. Cytosolic soluble proteins are in hypotonic buffer (Hypo), peripheral membrane proteins in carbonate buffer (Carb), integral membrane proteins in Triton X-100 buffer (Trx), and insoluble proteins in pellet (Pel). DHHC2 is in the membrane-associated fractions as IMC protein GAP45 and PM protein MSP1, while cytoplasm protein GAPDH is in the soluble fraction. Two replicates performed.

**F.** Immunoblot of DHHC2 from early stages containing ring and trophozoite (R/T) and late stages containing schizont (S) of the *dhhc2::6HA* parasites. Merozoite surface protein MSP1 was mainly expressed in the schizonts. BiP, histone H3, and Coomassie blue staining of total lysate were used as loading control. Two replicates performed.

**G.** DHHC2 expression dynamics in different asexual blood stages (ring, trophozoite, schizont, and merozoite) of the parasite *dhhc2::6HA* by IFA. Scale bar = 5  $\mu$ m.

**H.** Fluorescent microscopy of GFP::DHHC2 in different asexual blood stages of the parasites *gfp::dhhc2*. Scale bar = 5  $\mu$ m.

**I.** Maximum intensity projections of super-resolution immunofluorescence microscopy (Airyscan) of early and mature *dhhc2::6HA* schizonts stained with anti-HA and anti-GAP45 antibodies. Scale bar = 5  $\mu$ m.

**J.** Model showing the IMC-associated localization of DHHC2 in the schizonts.



Figure 5

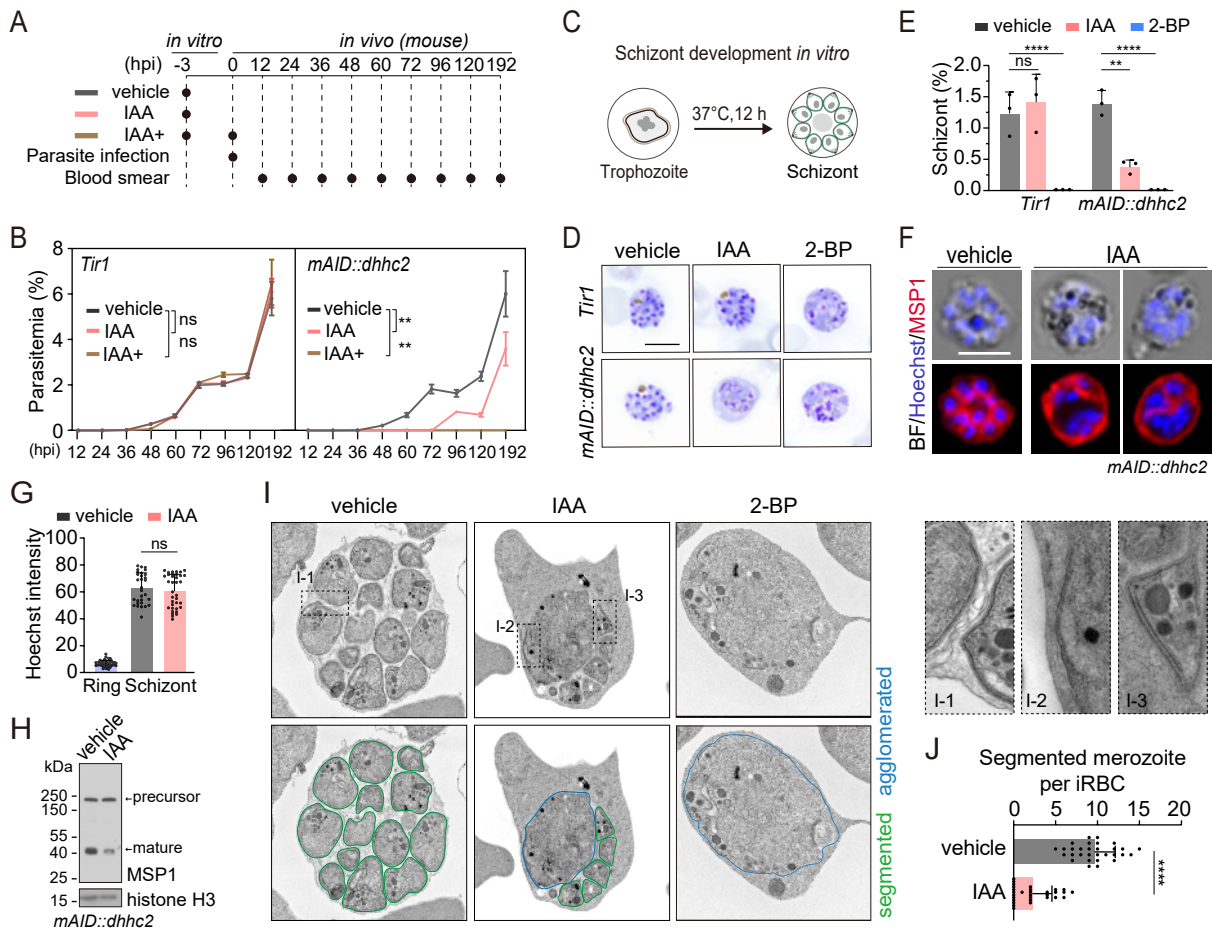

**Figure 5. DHHC2 is essential for parasite proliferation in mice and regulates schizont segmentation and merozoite invasion**

**A.** Experimental design of *in vivo* test of DHHC2 essentiality using AID. Parasites of *Tir1* and *mAID::dhhc2* were pretreated with vehicle or IAA for 3 h *in vitro*, then intravenously injected to C57BL/6 mice. In the IAA+ treatment group, another IAA injection (200 mg/kg, *ip*) at time of parasite infection was applied for further DHHC2 depletion *in vivo*. From 12 to 192 h post infection, the parasitemia in mice infected with *Tir1* and *mAID::dhhc2* was monitored by blood smear every 12 h.

**B.** *Tir1* and *mAID::dhhc2* parasite proliferation in mice (n = 3 per group) at each treatment group in **A**.

**C.** Schematic of the schizont development from trophozoite *in vitro*. Purified early stage parasites containing ring and trophozoite were cultured with vehicle, IAA, or 2-BP for 12 h to mature schizont.

**D.** Giemsa staining of the schizonts developed from *Tir1* and *mAID::dhhc2* parasites treated with vehicle, IAA, or 2-BP illustrated in **C**. Scale bar = 5  $\mu$ m.

**E.** Quantification of mature schizonts in **D**. Values are means  $\pm$  SEM (n = 3 biological replicates), two-tailed t-test, \*\*P < 0.01, \*\*\*\*P < 0.0001.

**F.** Co-staining of the *mAID::dhhc2* schizonts in **C** with antibody against merozoite surface protein MSP1 and Hoechst 33342. Scale bar = 5  $\mu$ m.

**G.** Quantification of Hoechst signal in schizonts indicating nuclear DNA contents in **F**. More than 30 schizonts were analyzed in each group. Signal in ring stage parasites serves as a control. Values were mean  $\pm$  SD, Mann Whiteny test applied, ns, not significant.

**H.** Immunoblot of MSP1 in the schizonts developed from the *mAID::dhhc2* parasites treated with vehicle and IAA. Precursor form (~200 kD) and mature form (~42 kD) of MSP1 were shown. Histone H3 used as a loading control.

**I.** Representative images of transmission electron microscopy (TEM) of schizonts developed from the *mAID::dhhc2* parasites treated with vehicle, IAA, or 2-BP. Right panels indicate 3 examples of representative daughter cell pellicle including PM and IMC.

**J.** Quantification of fully segmented merozoites in schizonts in **I**. More than 30 schizonts were analyzed in each group. Values were shown as mean  $\pm$  SD, Mann Whiteny test, \*\*\*\*P < 0.0001.

Figure 6

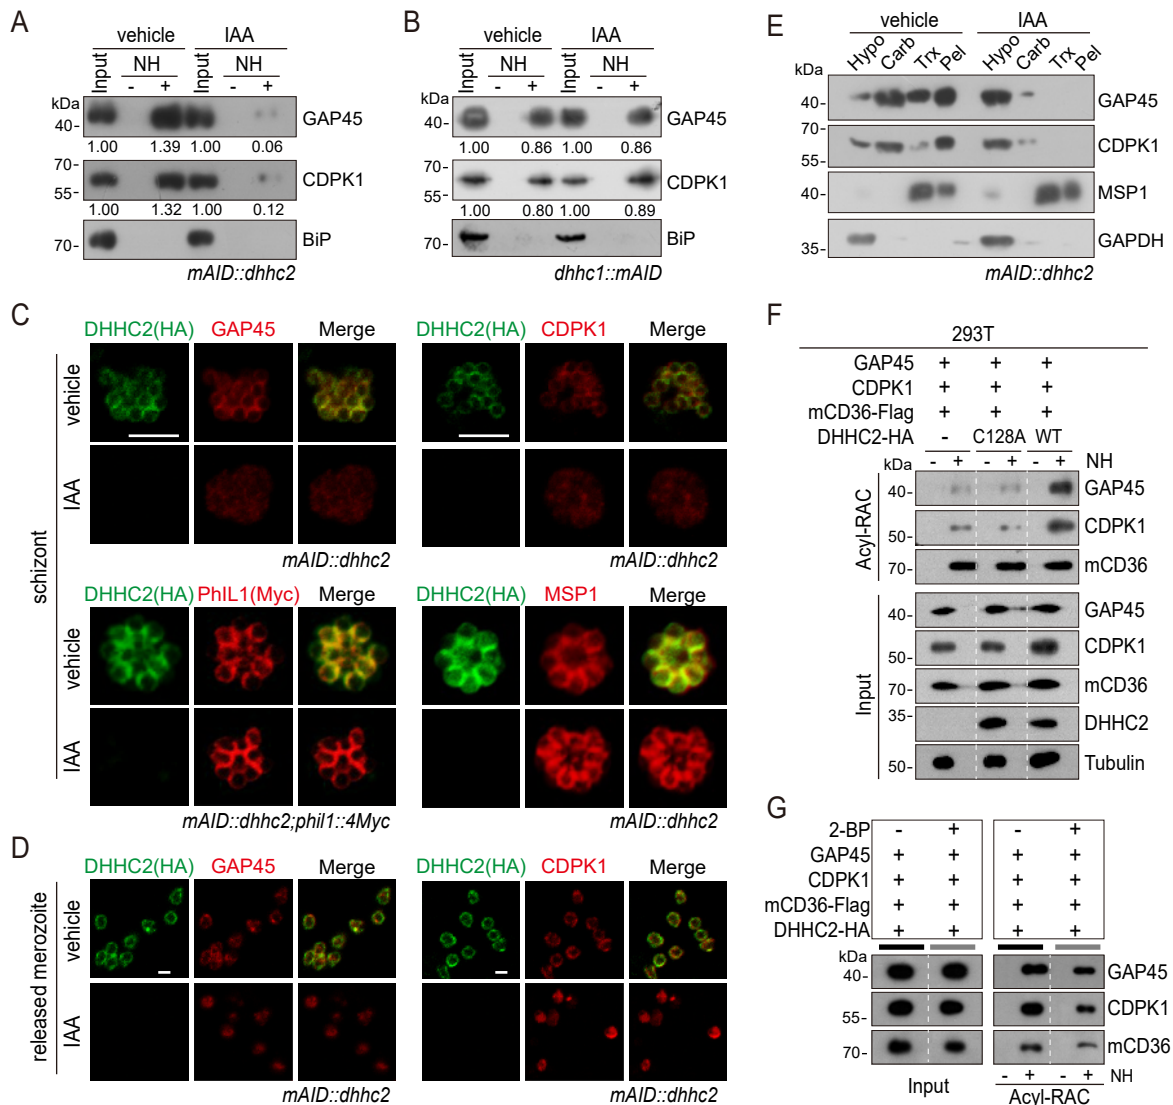

**Figure 6. DHHC2 palmitoylates GAP45 and CDPK1 in the schizonts**

**A.** Acyl-RAC method detecting palmitoylation of GAP45 and CDPK1 in the *mAID::dhhc2* schizonts treated with vehicle or IAA. BiP served as a loading control. Two replicates performed.

**B.** Acyl-RAC method detecting palmitoylation of GAP45 and CDPK1 in the *dhhc1::mAID* schizonts treated with vehicle or IAA. BiP served as a loading control. Two replicates performed.

**C.** IFA analysis of GAP45, CDPK1, PhIL1, and MSP1 expression in schizonts treated with vehicle or IAA. Parasites *mAID::dhhc2* and *mAID::dhhc2;phil1::4Myc* used are indicated. Scale bar = 5  $\mu$ m.

**D.** IFA analysis of GAP45 and CDPK1 in released *mAID::dhhc2* merozoites treated with vehicle or IAA. Scale bar = 5  $\mu$ m.

**E.** Solubility assay detected membrane association of GAP45, CDPK1, and MSP1 in the *mAID::dhhc2* schizonts treated with vehicle or IAA. PM protein MSP1 and cytoplasmic protein GAPDH are set as control. Two replicates performed.

**F.** Palmitoylation analysis of GAP45 and CDPK1 ectopically expressed in human cells. Human embryonic kidney 293T cells were co-transfected with plasmids coding for the HA-tagged and human codon-optimized DHHC2 (WT) or its catalytic-deficient mutant (C128A), along with the GAP45 and CDPK1. Flag-tagged mouse CD36 (mCD36-Flag) was also co-transfected and serves as a control of evidenced palmitoylated protein. Tubulin served as a loading control. Two replicates performed.

**G.** Palmitoylation analysis of GAP45 and CDPK1 ectopically expressed in human HEK293T cells treated with or without 2-BP. The cells were co-transfected with a HA-tagged and human codon-optimized DHHC2 and a Flag-tagged mouse CD36 (mCD36-Flag). Two replicates performed.

Figure 7

A

| GAP45<br>(184 aa) | Position        | Sequence         |
|-------------------|-----------------|------------------|
|                   | 5               | GSRC <b>S</b> KN |
|                   | 140             | TTP <b>C</b> DMD |
|                   | 156             | SRR <b>C</b> GCD |
|                   | 158             | RCG <b>C</b> DLG |
|                   | 169             | ENAC <b>K</b> IC |
| 172               | CKI <b>R</b> KI |                  |

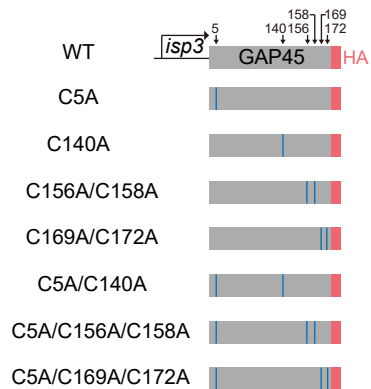

D

| CDPK1<br>(523 aa) | Position         | Sequence        |
|-------------------|------------------|-----------------|
|                   | 3                | MGC <b>N</b> QS |
| 252               | VW <b>S</b> CGVI |                 |

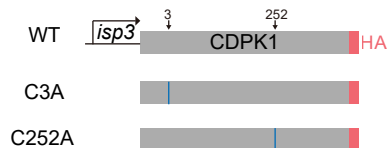

B

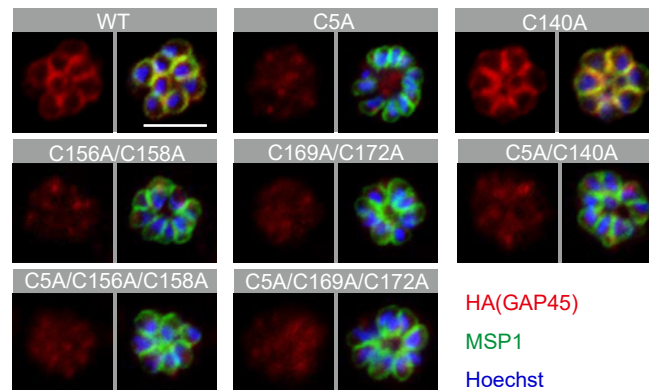

C

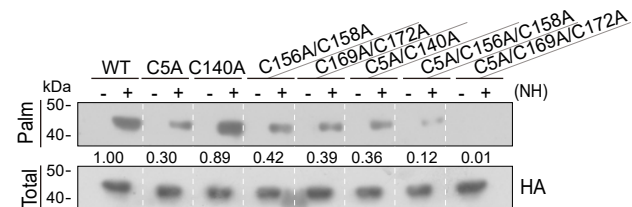

E

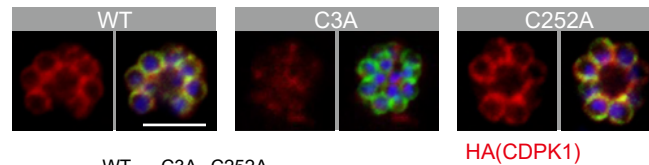

F

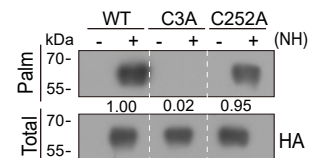

**Figure 7. Residues for palmitoylation in GAP45 and CDPK1**

**A.** 6 cysteine predicated for palmitoylation in GAP45 (upper panel). Lower panels indicate schematic of constructs expressing HA-tagged GAP45, each with a cysteine to alanine replacement in single, double, or triple residues (C5A, C140A, C156A/C158A, C169A/C172A, C5A/C140A, C5A/C156A/C158A, and C5A/C169A/C172A). These constructs were episomally expressed in the schizonts.

**B.** IFA of GAP45::HA and 7 mutant proteins episomally expressed in schizonts. Scale bar = 5  $\mu$ m. Representative of 3 independent repeats.

**C.** Palmitoylation analysis of GAP45::HA and 7 mutant proteins episomally expressed in schizonts. Representative of two independent repeats.

**D.** 2 cysteine predicated for palmitoylation in CDPK1 (upper panel). Lower panels indicate schematic of constructs expressing HA-tagged CDPK1, each with a cysteine to alanine replacement in single residue (C3A and C252A). These constructs were episomally expressed in the schizonts.

**E.** IFA of CDPK1::HA and 2 mutant proteins episomally expressed in schizonts. Scale bar = 5  $\mu$ m. Representative of 3 independent repeats.

**F.** Palmitoylation analysis of CDPK1::HA and 2 mutant proteins episomally expressed in schizonts. Representative of two independent repeats.

## **Supplemental Information**

### **Inner membrane complex proteomics reveals a palmitoylation cascade regulating intraerythrocytic development of malaria parasite**

Pengge Qian<sup>1,4</sup>, Xu Wang<sup>1,4</sup>, Chuan-Qi Zhong<sup>1,4</sup>, Jiayu Wang<sup>2,4</sup>, Mengya Cai<sup>1</sup>, Wang  
Nguitragool<sup>3</sup>, Jian Li<sup>1,\*</sup>, Huiting Cui<sup>1,\*</sup>, Jing Yuan<sup>1,\*</sup>

1. Supplementary Figures 1-9 and figure legends
2. Table S1. List of IMC proteins identified in this study
3. Table S2. Primers and oligonucleotides used in this study



Figure S1

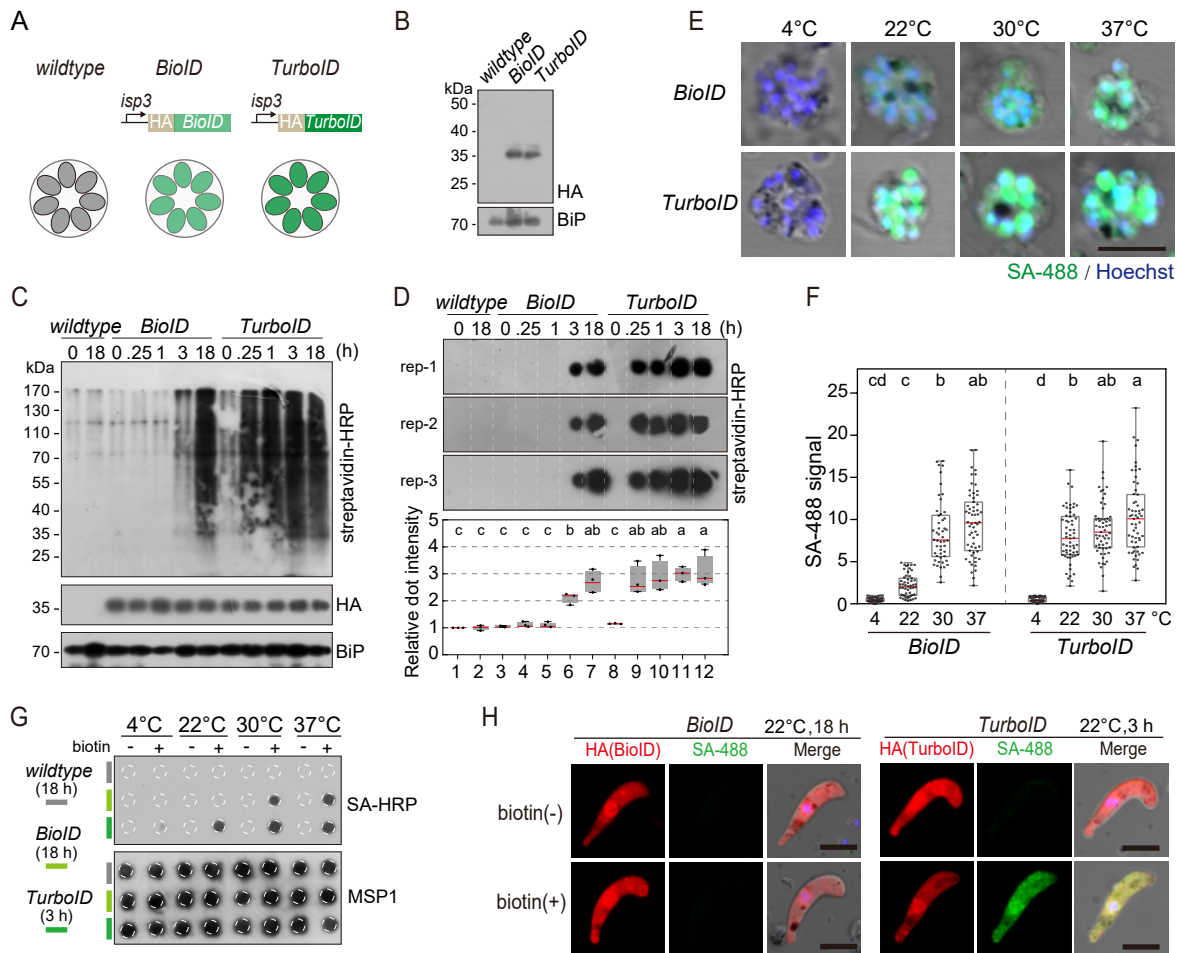

### **Supplementary Figure 1. Protein proximity labelling by biotin ligases BioID and TurboID in the *P. yoelii* parasites**

**A.** Schematic of the expressing cassettes for transient expression of BioID and TurboID. The ligase was fused with a HA and driven by the promoter of the *isp3* gene.

**B.** Immunoblot of the HA-tagged ligases episomally expressed in the asexual blood stages of the *P. yoelii*. BiP as the loading control.

**C.** Streptavidin blot detecting the biotinylated proteins from the wildtype, BioID or TurboID-expressing parasites incubated with exogenous biotin for different time (0, 0.25, 1, 3, and 18 h) at 37°C. ER protein BiP is a loading control.

**D.** Streptavidin dot blot of the biotinylated proteins from total lysate of parasites in **C**. Low panel shows the quantification of dot signals. Signals of wildtype parasite at 0 h are set as 1.0, red bars indicate mean value. Different letters above the boxes indicate significant difference with a  $p < 0.05$ . ANOVA analysis, followed by Tukey's multiple comparison tests ( $n = 3$  biological replicates).

**E.** IFA of the biotinylated proteins in the schizonts from the BioID or TurboID-expressing parasites incubated at different temperature (4, 22, 30, and 37°C). Wildtype and BioID parasites were incubated with biotin for 18 h while TurboID parasites were incubated with biotin for 3 h. Parasites were stained with the Alexa Fluor 488 conjugated streptavidin (SA-488). Scale bar=5  $\mu\text{m}$ .

**F.** Quantitation of IFA signal intensity in **E**. In each group, at least 30 parasite cells were counted. The signals were shown in the box-and-whisker plot and red bars indicate mean value. Different letters above the boxes indicate significant difference with a  $p < 0.05$ . ANOVA analysis, followed by Tukey's multiple comparison tests ( $n = 3$  biological replicates).

**G.** Streptavidin dot blot of the biotinylated proteins from the parasite lysates in **E**. Merozoite surface protein MSP1 is used as the loading control.

**H.** IFA detecting the biotinylated proteins in the ligase-expressing ookinetes with or without biotin inoculation at 22°C. Cultured ookinetes expressing BioID and TurboID ligase were incubated for 18 or 3 h respectively, with or without 100  $\mu\text{M}$  biotin at 22°C. The ookinetes were co-stained with the SA-488 and anti-HA antibody. Scale bar=5  $\mu\text{m}$ .

Figure S2

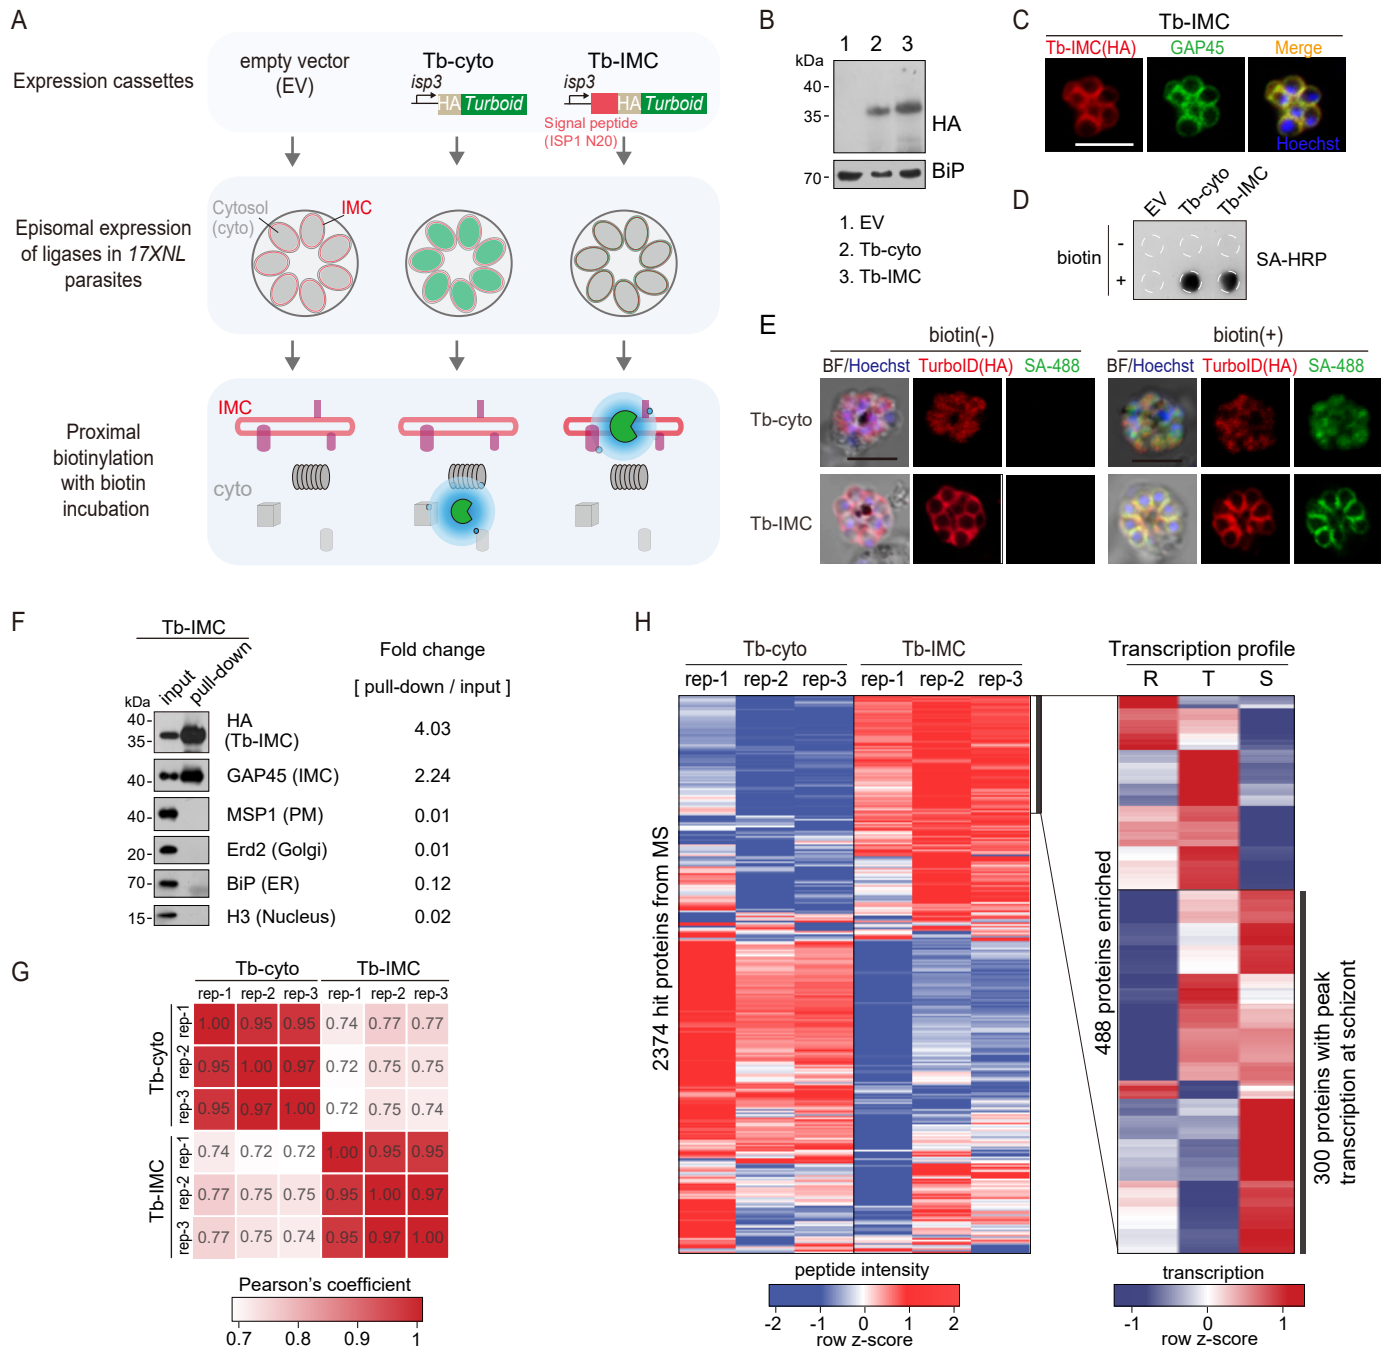

## Supplementary Figure 2. TurboID-mediated labelling of IMC proteins in the schizonts

**A.** Experimental workflow for TurboID proximity labeling of the IMC proteins in the schizont. The HA-tagged TurboID is fused with an IMC signal peptide, the N-terminal 20 residues of ISP1 (Tb-IMC). The HA-tagged TurboID alone (Tb-cyto) serves as a control for non-specific biotinylation. Both ligases (Tb-IMC and Tb-cyto) were driven by the promoter of gene *isp3* and episomally expressed in the asexual blood stages. The schizonts expressing Tb-IMC, Tb-cyto, or empty vector (EV: construct without ligase gene) were purified and cultivated with 100  $\mu$ M biotin at 37°C for 3 h.

**B.** Immunoblot of the HA-tagged ligase from the total lysate of schizonts expressing the Tb-cyto or Tb-IMC shown in A. ER protein BiP used as a loading control.

**C.** IFA of the Tb-IMC expressing schizonts with anti-HA antibody, anti-GAP45 antibody, and DNA stain Hoechst 33342. Scale bar=5  $\mu$ m.

**D.** Streptavidin dot blot of biotinylated proteins in the EV, Tb-cyto, Tb-IMC expressing schizonts incubated with or without 100  $\mu$ M biotin.

**E.** Co-staining of TurboID ligase and biotinylated proteins in the schizonts expressing the Tb-cyto or Tb-IMC. The schizonts incubated with or without 100  $\mu$ M biotin were co-stained with anti-HA antibody and streptavidin-488 (SA-488). Scale bar=5  $\mu$ m.

**F.** Immunoblot of streptavidin-affinity purified biotinylated proteins in Tb-IMC schizonts. Tb-IMC ligase and several organelle marker proteins were probed with the indicated antibodies. Relative band intensity of each protein in the pull-down compared to the input indicates the enrichment ratio.

**G.** Correlation analysis of change in protein abundance among biological replicates between Tb-cyto and Tb-IMC. Three biological replicates were prepared from Tb-IMC and Tb-cyto schizonts, and the streptavidin-affinity purified proteins were for proteomic analysis by MS.

**H.** Identification of 300 Tb-IMC interacting protein by quantitative MS and comparative transcription profiling. Clustered heatmap (left panel) of MS peptide intensity revealed 488 enriched proteins with high confidence (an adjusted P value < 0.05) in Tb-IMC compared to Tb-cyto. Comparative analysis of transcription pattern (right panel) based on the *P. berghei* transcriptome further narrow the candidates to 300 proteins, in which many known IMC or IMC-associated proteins were indicated. R: ring, T: trophozoite, and S: schizont.

Figure S3

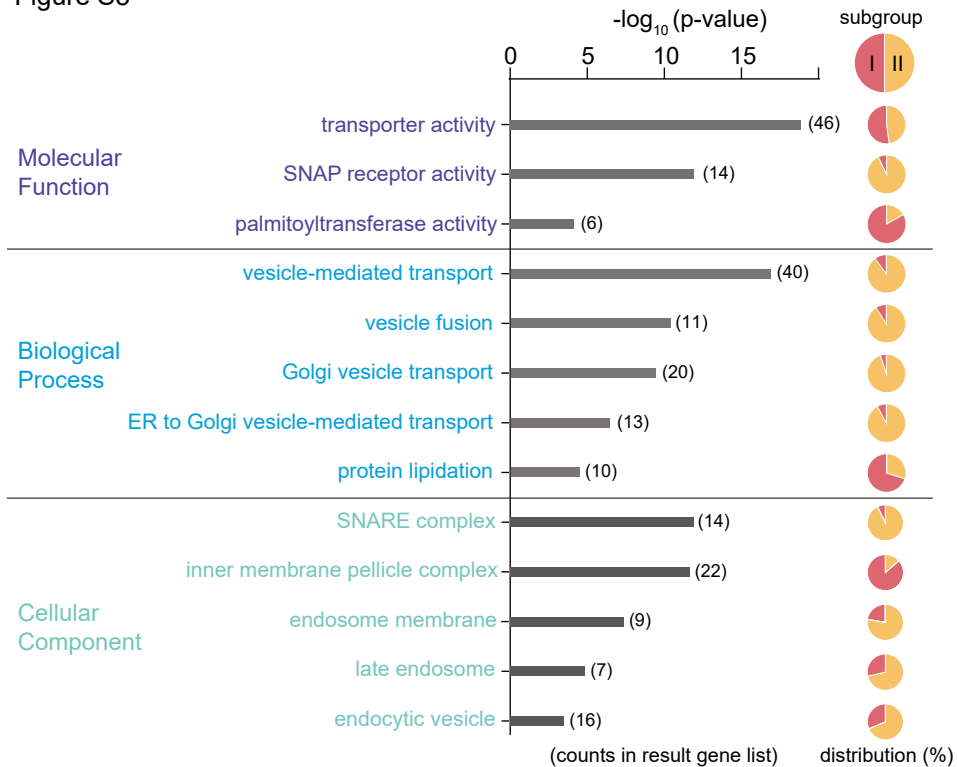

### **Supplementary Figure 3. Predicated functional profile of the Tb-IMC interacting proteins**

Gene ontology analysis of the 300 Tb-IMC interacting proteins. Bar plot showing the significantly enriched GO terms from “Molecular Function” (top panel), “Biological Process” (middle panel) and “Cellular Component” (bottom panel). For each of GO terms, the distribution of proteins from the subgroup I and II was indicated in the pie chart.

Figure S4

A

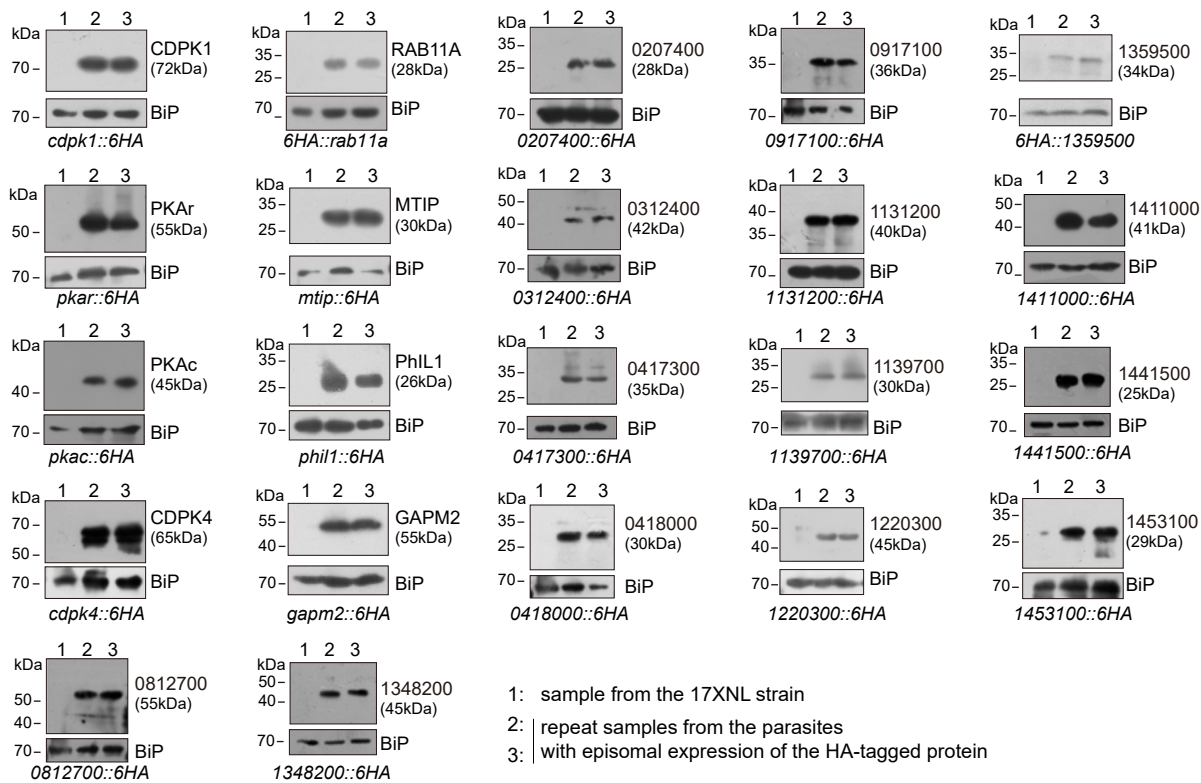

B

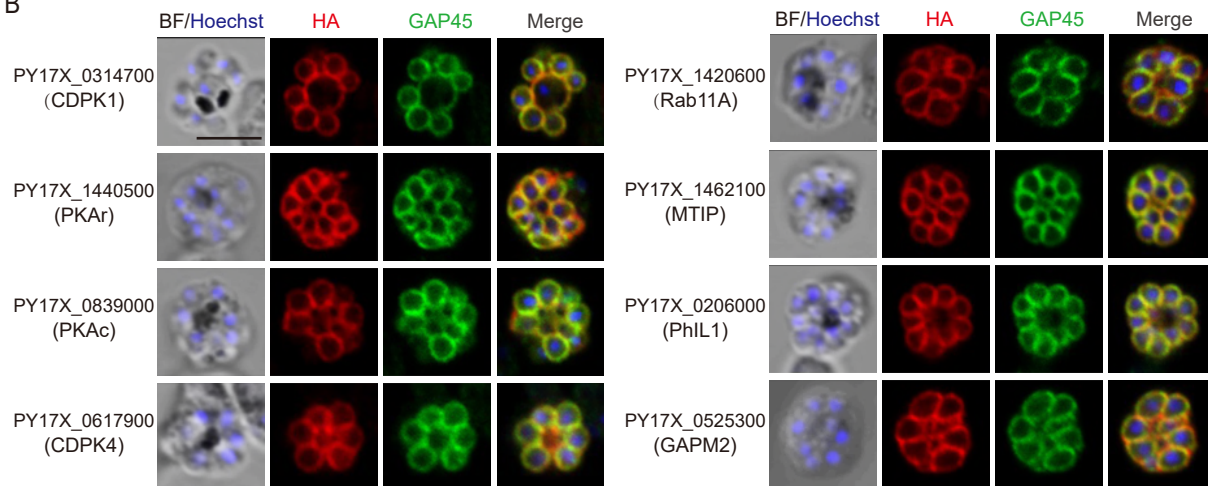



**Supplementary Figure 4. Expression and localization analysis of IMC protein candidates selected in this study**

**A.** Immunoblot of 22 IMC protein candidates in the schizonts of *P. yoelii*. Each candidate protein was tagged with a 6HA at the N- or C-terminus and episomally expressed in the schizonts. BiP as the loading control.

**B.** IFA of 8 known IMC proteins in the *P. yoelii* schizonts. The orthologues of 8 proteins, including CDPK1, CDPK4, PKAr, PKAc, Rab11A, MTIP, PhIL1, and GAPM2, have been experimentally validated to be IMC-residing in the schizonts of *P. berghei* or *P. falciparum*. Each protein was tagged with a 6HA at the N- or C-terminus and episomally expressed in the schizonts. The schizonts were co-stained with antibodies against GAP45 and HA. Nuclei were stained with Hoechst 33342. Scale bar=5  $\mu$ m.

Figure S5

A

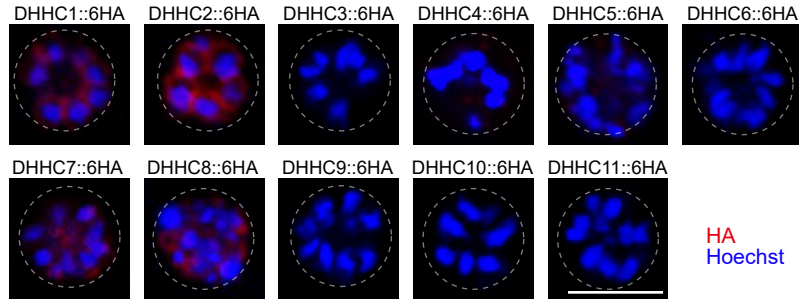

B

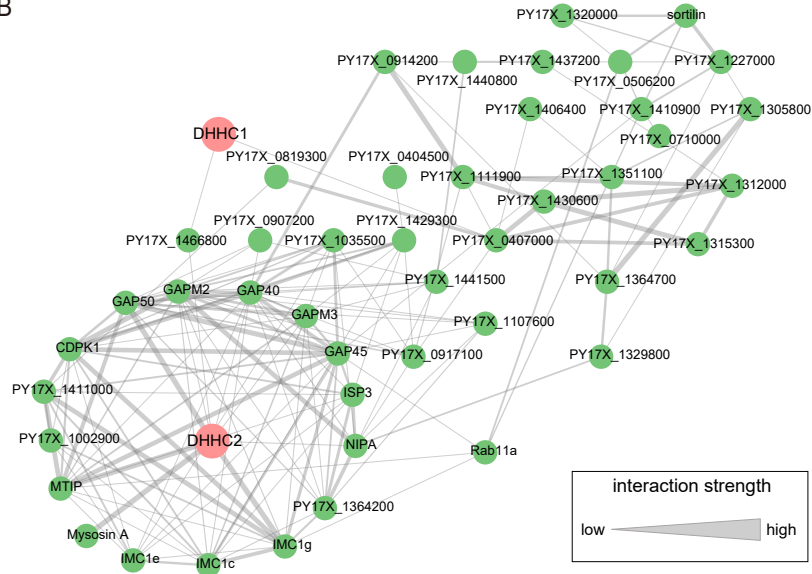

**Supplementary Figure 5. Localization analysis of 11 PATs (DHHC1-11) in schizonts**

**A.** IFA analysis of 11 PATs (DHHC1-11) expression in the schizonts. Each of individual *P. yoelii* PATs was endogenously tagged with a 6HA in the transgenic strains generated previously. The schizonts were co-stained with the anti-HA antibody and Hoechst 33342. Scale bar = 5  $\mu$ m.

**B.** Predicted protein interaction network between DHHC1/DHHC2 and the putatively palmitoylated Tb-IMC interacting proteins (STRING;  $p < 1.0e-16$ ).

Figure S6

A

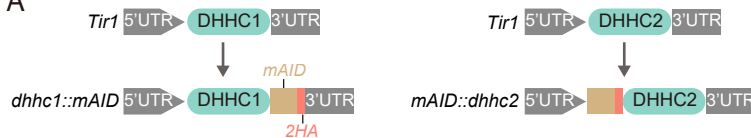

B

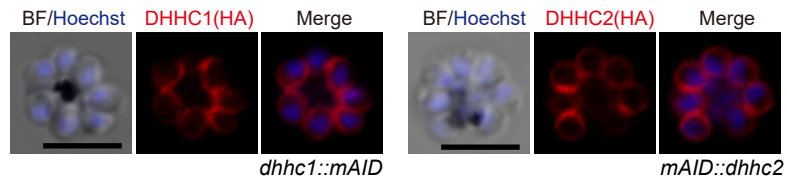

C

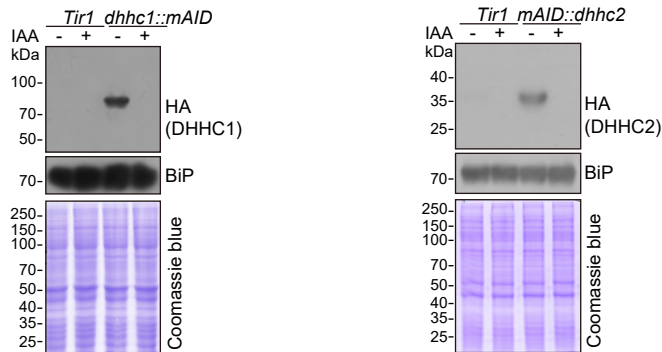

D

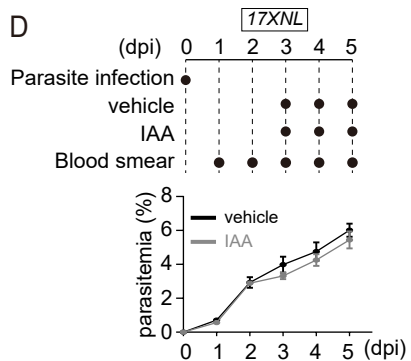

E

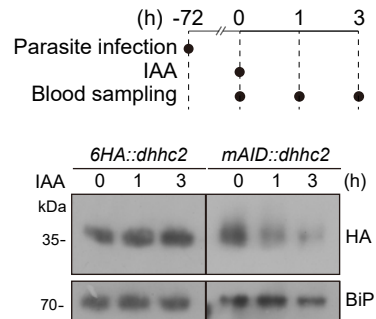

**Supplementary Figure 6. Generation and characterization of the modified strains with endogenous DHHC2 and DHHC2 tagged with a mAID motif for induced degradation.**

**A.** Schematic of generation of modified strains with endogenous DHHC1 and DHHC2 tagged with a mAID motif for induced degradation by IAA. A mAID::2HA was inserted in-frame to the C-terminus of endogenous DHHC1 and N-terminus of endogenous DHHC2 in the parental parasite *Tir1* using the CRISPR/Cas9 method, generating the strains *dhhc1::mAID* and *mAID::dhhc2* respectively. mAID: mini auxin-inducible degenon.

**B.** IFA of the fusion proteins DHHC1::mAID (left panel) and mAID::DHHC2 (right panel) in the schizonts of *dhhc1::mAID* and *mAID::dhhc2* parasites. Scale bar = 5  $\mu$ m.

**C.** Immunoblot of fusion proteins DHHC1::mAID (left panel) and mAID::DHHC2 (right panel) in the schizonts of the *Tir1*, *dhhc1::mAID* and *mAID::dhhc2* parasites treated with vehicle or IAA (1 mM) for 3 h. BiP and Coomassie blue staining were used as the loading control.

**D.** Proliferation assessment of wildtype parasite in mice treated with IAA. Upper panel indicates the experimental design. C57BL/6 mice with ~2-3% parasitemia of wildtype parasite (*17XNL*) were injected intraperitoneally with 200 mg/kg/day IAA or vehicle each day for three days (day 3 to 5). Parasitemia was monitored by Giemsa staining of blood smear at indicated time.

**E.** IAA-induced degradation assessment of parasite mAID::DHHC2 protein in mice. Upper panel indicates the experimental design. C57BL/6 mice with ~10% parasitemia of *mAID::dhhc2* or *6HA::dhhc2* parasites were injected intraperitoneally with IAA (200 mg/kg) for one time and the parasite-infected red blood cells were collected for detecting the protein abundance by immunoblot at different time post IAA injection. BiP was used as a loading control.

Figure S7

A

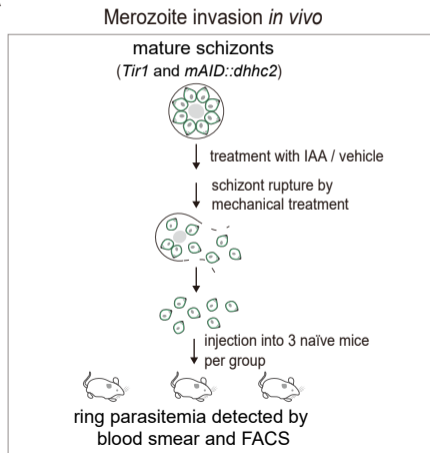

B

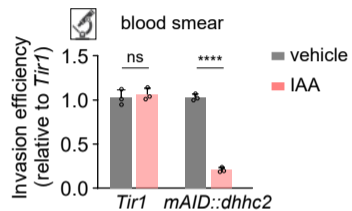

C

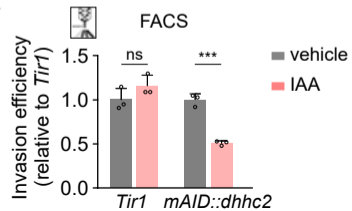

**Supplementary Figure 7. DHHC2 depletion impaired merozoite invasion.**

**A.** Schematic of merozoite invasion in the mouse. Purified mature schizonts of *Tir1* and *mAID::dhhc2* parasites were pre-treated with IAA for 3 h for protein depletion. Followed by mechanical treatment of schizont for rupture, the released merozoites were collected and injected intravenously into 3 naïve mice per condition. 20 min post-injection, the ability of merozoite invasion was evaluated by counting the parasitemia (ring stage parasite) using blood smear and flow cytometry.

**B, C.** Histogram showing the invasion efficiency of merozoite in the mice acquired by blood smear (**B**) and flow cytometry (**C**). Invasion efficiency of vehicle-treated group was set as 1.0. Values were mean  $\pm$  SD, two-tailed t-test, \*\*\*P < 0.001, ns, not significant.



Figure S8

A

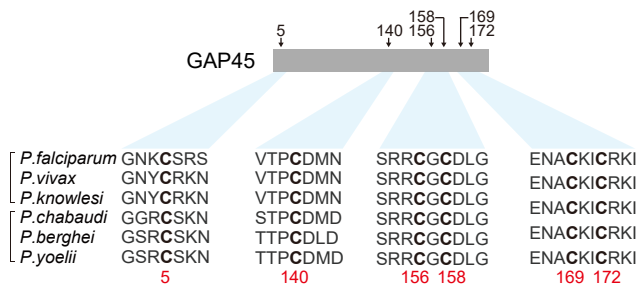

C

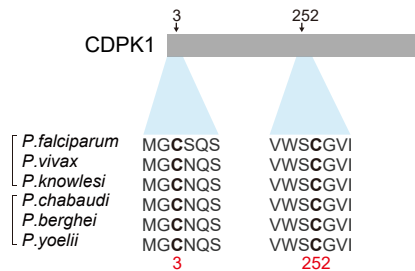

B

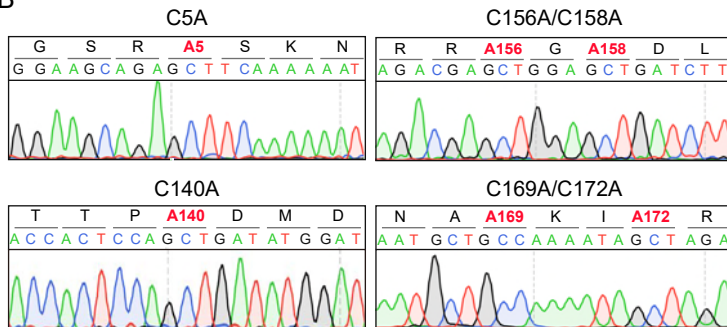

D

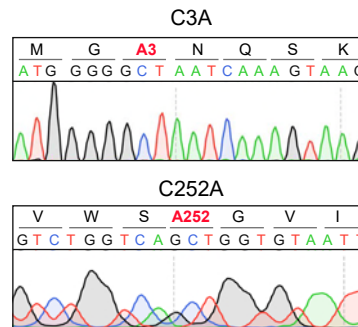

E

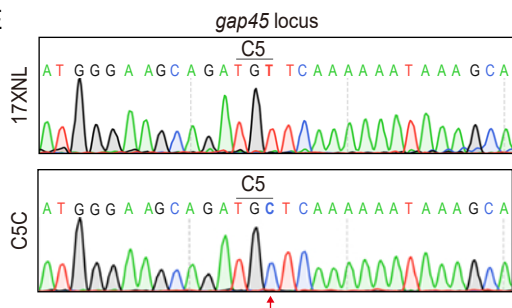

F

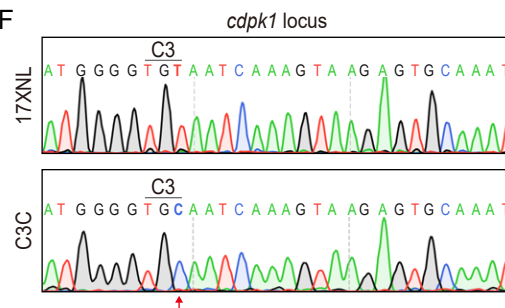

**Supplementary Figure 8. Potential cysteine(s) in GAP45 and CDPK1 for palmitoylation and protein mutants with cysteine replacement to validate the essentiality**

**A.** Amino acid sequence of GAP45 from *P. falciparum* (PF3D7\_1222700), *P. vivax* (PVX\_123765), *P. knowlesi* (PKNH\_1441800), *P. chabaudi* (PCHAS\_1439600), *P. berghei* (PBANKA\_1437600), and *P. yoelii* (PY17X\_1440100) were aligned. 6 conserved cysteine (highlighted in bold) predicated for palmitoylation was shown.

**B.** DNA sequencing confirmation of the constructs expressing HA-tagged GAP45, each with a cysteine to alanine replacement in single or double residues (C5A, C140A, C156A/C158A, and C169A/C172A). These constructs were episomally expressed in the schizonts.

**C.** Amino acid sequence of CDPK1 from *P. falciparum* (PF3D7\_0217500), *P. vivax* (PVX\_002665), *P. knowlesi* (PKNH\_0403400), *P. chabaudi* (PCHAS\_0316300), *P. berghei* (PBANKA\_0314200), and *P. yoelii* (PY17X\_0314700) were aligned. 2 conserved cysteine (highlighted in bold) predicated for palmitoylation was shown.

**D.** DNA sequencing confirmation of the constructs expressing HA-tagged CDPK1, each with a cysteine to alanine replacement (C3A and C252A). These constructs were episomally expressed in the schizonts.

**E.** DNA sequencing confirmation of nucleotide replacement in the *gap45* locus of the GAP45 C5C parasite clone. Top panel shows the nucleotide sequence from the parasite 17XNL strain; the bottom panel shows the replaced nucleotide (silent mutation) in the clone GAP45 C5C.

**F.** DNA sequencing confirmation of nucleotide replacement in the *gcdpk1* locus of CDPK1 C3C parasite clone. Top panel shows the nucleotide sequence from the parasite 17XNL strain; the bottom panel shows the replaced nucleotide (silent mutation) in the clone CDPK1 C3C.

Figure S9

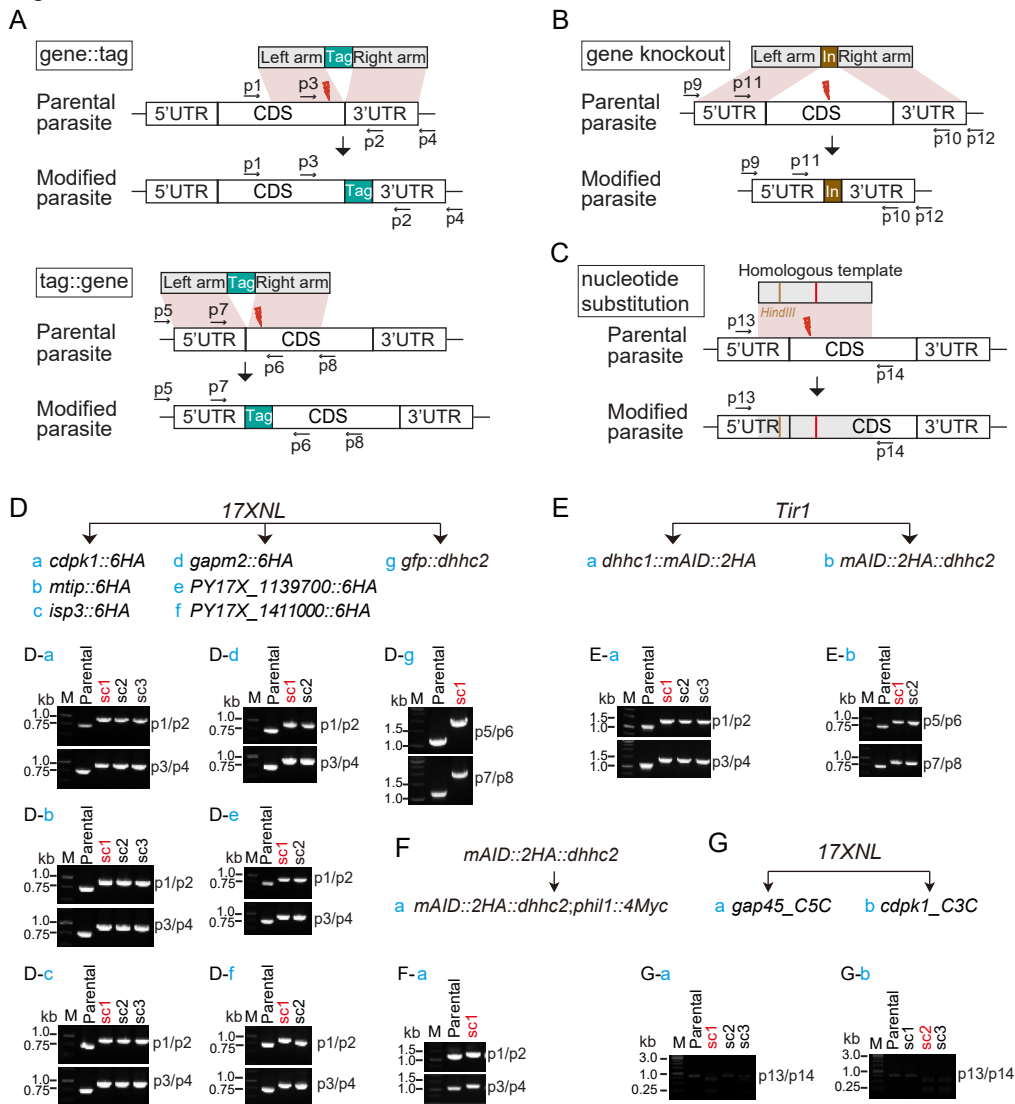

**Supplementary Figure 9.** Genotyping of genetically modified parasites in this study.

**A-C.** Schematic representation for CRISPR/Cas9 mediated gene modification, including the N-terminal and C-terminal tagging of genes with epitope tag (**A**), gene deletion (**B**), and nucleotide substitution (**C**) via double cross homologous recombination.

**D-G.** For each modification, both 5' and 3' homologous recombination was detected using gene specific PCR ([Supplementary Table 2](#)) to confirm successful integration of the homologous templates. Usually, one to three parasite clones (sc) for each modification were obtained after limiting dilution, and the clone indicated with red letter is used for further phenotype and functional analysis.
